# Supplementary material for: Oral insulin immunotherapy in children at risk for type 1 diabetes in a randomised controlled trial
Source: Springer Nature journal article supplement (doi:10.1007/s00125-020-05376-1), 2021-01-29
Supplement: MOESM1 [file 18814006]

## Electronic supplementary material (ESM)

Oral insulin immunotherapy in children at risk for type 1 diabetes in a randomised controlled trial

Robin Assfalg<sup>1,2,3</sup>, Jan Knoop<sup>1</sup>, Kristi L. Hoffman<sup>4</sup>, Markus Pfirrmann<sup>5</sup>, Jose Maria Zapardiel-Gonzalo<sup>1</sup>, Anna Hofelich<sup>2</sup>, Anne Eugster<sup>6,7</sup>, Marc Weigelt<sup>6</sup>, Claudia Matzke<sup>1</sup>, Julia Reinhardt<sup>6</sup>, Yannick Fuchs<sup>6</sup>, Melanie Bunk<sup>1</sup>, Andreas Weiss<sup>1</sup>, Markus Hippich<sup>1</sup>, Kathrin Halfter<sup>5</sup>, Stefanie M. Hauck<sup>8</sup>, Jörg Hasford<sup>5</sup>, Joseph F. Petrosino<sup>4</sup>, Peter Achenbach<sup>1,2,3</sup>, Ezio Bonifacio<sup>3,6,7,9</sup>, Anette-Gabriele Ziegler<sup>1,2,3</sup>

<sup>1</sup>Institute of Diabetes Research, Helmholtz Zentrum München, German Research Center for Environmental Health, Munich-Neuherberg, Germany

<sup>2</sup>Forschergruppe Diabetes, Technical University Munich, at Klinikum rechts der Isar, Munich, Germany

<sup>3</sup>German Center for Diabetes Research (DZD), Munich, Germany

<sup>4</sup>Alkek Center for Metagenomics and Microbiome Research, Department of Molecular Virology and Microbiology, Baylor College of Medicine, Houston, TX, USA

<sup>5</sup>Institute for Medical Information Processing, Biometry, and Epidemiology, Ludwig-Maximilians-University Munich, Munich, Germany

<sup>6</sup>Technische Universität Dresden, Center for Regenerative Therapies Dresden, Dresden, Germany

<sup>7</sup>Paul Langerhans Institute Dresden of the Helmholtz Center Munich at University Hospital Carl Gustav Carus and Faculty of Medicine, TU Dresden, Dresden, Germany

<sup>8</sup>Research Unit Protein Science, Helmholtz Zentrum München, German Research Center for Environmental Health, Munich-Neuherberg, Germany

<sup>9</sup>Institute for Diabetes and Obesity, Helmholtz Diabetes Center at Helmholtz Zentrum München, Munich-Neuherberg, Germany

Robin Assfalg, Jan Knoop and Kristi L. Hoffman are joint first authors.

Corresponding author

Anette-Gabriele Ziegler,

E-mail: [anette-g.ziegler@helmholtz-muenchen.de](mailto:anette-g.ziegler@helmholtz-muenchen.de)

## Table of content

|                                                                                                                       |    |
|-----------------------------------------------------------------------------------------------------------------------|----|
| ESM Methods.....                                                                                                      | 4  |
| Randomisation and masking .....                                                                                       | 4  |
| Investigational Medicinal Product .....                                                                               | 4  |
| Measurements of islet autoantibodies .....                                                                            | 4  |
| Measurements of immune responses to insulin.....                                                                      | 4  |
| Phenotyping of lymphocytes and monocytes.....                                                                         | 5  |
| Single-cell gene expression profiling of CD4 <sup>+</sup> T cells responding to insulin.....                          | 5  |
| Blood cell counts, blood chemistry, electrolytes, IgE .....                                                           | 6  |
| Plasma inflammatory markers .....                                                                                     | 6  |
| Stool microbiome .....                                                                                                | 6  |
| <i>INS</i> genotyping.....                                                                                            | 7  |
| Recording of adverse events.....                                                                                      | 7  |
| Statistical comparisons.....                                                                                          | 7  |
| References.....                                                                                                       | 8  |
| ESM Results .....                                                                                                     | 9  |
| IgE .....                                                                                                             | 9  |
| Laboratory analysis .....                                                                                             | 9  |
| Adverse events .....                                                                                                  | 9  |
| Protocol violations .....                                                                                             | 9  |
| Tables                                                                                                                |    |
| ESM Table 1   Treatment duration and adherence .....                                                                  | 10 |
| ESM Table 2   Blood glucose, insulin and c-peptide measurements.....                                                  | 11 |
| ESM Table 3a   Full blood examination .....                                                                           | 12 |
| ESM Table 3b   Blood chemistry .....                                                                                  | 13 |
| ESM Table 4a   Adverse advents (AEs) and severity grade .....                                                         | 14 |
| ESM Table 4b   Adverse events of the system organ class “skin.....                                                    | 15 |
| ESM Table 5   Maximum antibody and CD4 <sup>+</sup> T cell response to insulin ( <i>INS</i> AA genotype).....         | 16 |
| ESM Table 6   Correlations between cell frequencies, CD169 <sup>+</sup> monocytes, inflammatory markers, and age..... | 17 |
| ESM Table 7   List of genes and primers used for single cell gene expression profiling .....                          | 20 |

## Figures

|                                                                                      |    |
|--------------------------------------------------------------------------------------|----|
| ESM Fig. 1   Flow analysis scheme to identify insulin responsive T cells.....        | 23 |
| ESM Fig. 2   Skin or subcutaneous tissue disorders.....                              | 24 |
| ESM Fig. 3   Microbiome alterations in relation to age by WGS.....                   | 25 |
| ESM Fig. 4   Relative abundance of species level taxonomies in relation to age.....  | 26 |
| ESM Fig. 5   Microbiome alterations in relation to age, treatment, and genotype..... | 27 |
| ESM Fig. 6   Immune cell population frequencies over time.....                       | 28 |
| ESM Fig. 7   Immune profiling markers in the study participants.....                 | 29 |
| ESM Fig. 8   Monocyte CD169 expression associations with microbiome and age.....     | 30 |
| ESM Fig. 9   CD8 <sup>+</sup> T cell responses to insulin (SI).....                  | 31 |
| ESM Fig. 10   Gene expression in insulin-responsive CD4 <sup>+</sup> T cells.....    | 32 |

## **ESM Methods**

### **Randomisation and masking**

A computer-generated randomisation list was prepared with an allocation ratio of 1:1 (placebo to oral insulin) using a web-based system (<https://wwwapp.ibe.med.uni-muenchen.de/randoulette/>). All investigators and participants were masked to the treatment allocation. Unblinding was not necessary during the study.

### **Investigational Medicinal Product**

Insulin crystals were provided by Lilly Pharmaceuticals (Indianapolis, Indiana). The investigational medicinal products (insulin and placebo) were manufactured as identical capsules containing either insulin crystals (7.5 mg, 22.5 mg, or 67.5 mg) in microcrystalline cellulose (total capsule content 200 mg) or 200 mg microcrystalline cellulose placebo by InPhaSol, Apotheke des Universitätsklinikums Heidelberg, Germany. The drug packages were sequentially numbered according to the randomly allocated treatment. Parents were instructed to sprinkle the contents of one capsule onto one teaspoon of food (e.g. yogurt, breast milk, or commercial baby food) for administration once daily.

### **Measurements of islet autoantibodies**

Autoantibodies to glutamic acid decarboxylase (GADA), insulinoma-associated antigen 2 (IA-2A), and zinc transporter-8 (ZnT8A) were measured using harmonized radio binding methods [1, 2]. Islet autoantibody assays were evaluated according to the Diabetes Antibody Standardisation Program [3-5].

### **Measurements of immune responses to insulin**

Insulin autoantibody (IAA) levels were measured using a competitive radio binding assay [6, 7]. A positive response was defined as a value of  $\geq 1.5$  and a  $\geq 2$ -fold increase from baseline. Serum IgG binding to insulin was measured by a non-competitive radio binding assay with protein-G capture of IgG [8]. A positive response was defined as an increase of  $>10$  counts/min from the baseline value. Salivary IgA binding to insulin was measured using a radio binding assay as previously described [9]. A positive response was defined as an increase of  $\geq 3$ -fold from baseline. Serum IgE against insulin was measured using a radio binding assay [10].

CD4<sup>+</sup> T cell antigen responses were measured using stored frozen peripheral blood mononuclear cells (PBMCs). Responses were measured using a dye (Cell Proliferation Dye eFluor 670, eBioscience, San Diego, CAL, USA) dilution assay, quantifying proliferation (eFluor670dim cells) and activation (CD25<sup>+</sup>) after 5 days of culture without or with the antigen insulin that was identical to the insulin administered to the children (50 µg/ml, Lilly Pharmaceuticals) as previously described [9] (ESM Fig. 1). The assay included a median of 12 wells containing 200,000 eFluor670 dye-labelled cells in medium plus insulin and 6 wells with cells and medium alone. The SI was calculated as the number of CD4<sup>+</sup> eFluor670dimCD25<sup>+</sup> cells per 50,000 acquired live CD4<sup>+</sup> T cells in all wells containing insulin relative to the number of CD4<sup>+</sup> eFluor670dimCD25<sup>+</sup> cells per 50,000 acquired live CD4<sup>+</sup> T cells in all wells containing medium alone. A positive sample was defined as an SI of  $>3$ . A positive T cell outcome was defined as a positive sample and an increase in SI of  $>2$ -fold at any follow-up visit relative to the

baseline value. CD8<sup>+</sup> T cell proliferation responses to insulin were also measured in the same assay by gating on CD8<sup>+</sup>CD4<sup>-</sup> T cells (ESM Fig. 1).

### **Phenotyping of lymphocytes and monocytes**

Freshly isolated PBMCs ( $2.5 \times 10^5$  cells) were incubated for 1 min at room temperature with Fc receptor blocking reagent (Miltenyi Biotec, Bergisch Gladbach, Germany). Cell surface markers were stained for 20 min at 4 °C in phosphate-buffered saline (PBS) without Ca<sup>2+</sup> and Mg<sup>2+</sup> (PBS<sup>-/-</sup>; Gibco) containing 0.5% bovine serum albumin using the following mouse anti-human monoclonal antibodies: anti-CD3 Alexa Fluor 700 (clone HIT3 $\alpha$ ; BioLegend, San Diego, CAL, USA), anti-CD4 Brilliant Violet 510 (SK3; BD Biosciences, San Jose, CAL, USA), anti-CD8a Brilliant Violet 605 (RPA-T8), anti-CD14 Pacific Blue (HCD14), anti-CD16 PerCP-Cy5.5 (3G8; all BioLegend, San Diego, CAL, USA), anti-CD25 PE (M-A251; BD Biosciences, San Jose, CAL, USA), anti-CD45RA PE-Cy5 (HI100; BioLegend, San Diego, CAL, USA), anti-CD69 fluorescein isothiocyanate (FN50; BD Biosciences, San Jose, CAL, USA), anti-CD127 PE-Cy7 (A019D5) and anti-CD169 Alexa Fluor 647 (7-239; both BioLegend, San Diego, CAL, USA). Cells were washed twice in PBS<sup>-/-</sup> and stained for 20 min at room temperature with Zombie NIR (BioLegend, San Diego, CAL, USA) to evaluate cell viability. PBMCs were fixed with 1.5% formalin in PBS<sup>-/-</sup> and analysed within 24 h on a flow cytometer (LSR Fortessa, Becton Dickinson, Franklin Lakes, NJ, USA) using FACSDiva acquisition software (Version 7.0; BD Biosciences, San Jose, CAL, USA). FlowJo software (Version 10; TreeStar Inc., Ashland, OR, USA) was used to analyse lymphocyte and monocyte subsets.

### **Single-cell gene expression profiling of CD4<sup>+</sup> T cells responding to insulin**

CD4<sup>+</sup> T cells that had proliferated, as determined by eFluor® 670 dilution, and displayed CD25 upregulation were identified as responding cells and were single-cell-sorted directly into 96-well microplates containing 5  $\mu$ l of PBS prepared with diethylpyrocarbonate-treated water. For samples that had an SI against insulin above 3, cells were processed for gene expression. cDNA was synthesized directly from cells using qScript™ cDNA Supermix (Quanta Biosciences, Gaithersburg, MD, USA). Total cDNA was pre-amplified for 18 cycles, with 1 cycle of denaturation at 95 °C for 1 min, followed by cycling at 95 °C for 15 s, 60 °C for 1 min, and 72 °C for 1.5 min, followed by one cycle of 72 °C for 7 min, with TATAA GrandMaster Mix (TATAA Biocenter, Göteborg, Sweden) in the presence of 76 primer pairs at a final volume of 35  $\mu$ l (ESM Table 7). Then, 10  $\mu$ l of preamplified DNA was treated with 1.2 units of exonuclease I. To quantify gene expression, real-time PCR was performed on the BioMark™ HD System (Fluidigm Corporation, South San Francisco, CA, USA) using the 96.96 Dynamic Array IFC according to the GE 96  $\times$  96 Fast PCR+ Melt protocol with SsoFast EvaGreen Supermix containing Low ROX (Bio-Rad) and 5  $\mu$ M of primers in each assay. The primers and target genes are listed in Table S7. Raw data were analyzed using Fluidigm Real-Time PCR analysis software and GenEx Pro 5.3.6 Software (MultiD, Göteborg, Sweden). Additional data analysis was done using KNIME 2.5.2 software (KNIME AG, Zürich, Switzerland). Analysis of multivariate gene expression patterns was performed by Uniform Manifold Approximation and Projection for Dimension Reduction (UMAP) [11] and unsupervised WARD hierarchical clustering (hclust) on the pre-processed Ct values. For pre-processing, a linear model was used to correct for

potential confounding effects, which can mask relevant biological variability [12]. In brief, batch effects (dummy coding for each plate/batch) were modelled jointly with dose effects by regressing out the effect of plates on each individual gene while controlling for dose in order to obtain a corrected gene expression dataset.

### **Blood glucose, insulin, and C-peptide**

Plasma glucose was measured by an accredited laboratory (Medizet, Städtisches Klinikum München GmbH, Munich, Germany). Serum insulin and C-peptide concentrations were measured by fluorescence enzyme immunoassays using an automated immunoassay analyser (AIA-360, Tosoh Bioscience Inc., South San Francisco, CA, USA).

### **Blood cell counts, blood chemistry, electrolytes, IgE**

Blood cell counts, GOT, GPT, GGT, AP, albumin, creatinine, sodium, potassium, and IgE concentrations were measured by an accredited laboratory (Medizet, Städtisches Klinikum München GmbH, Munich, Germany).

### **Plasma inflammatory markers**

Inflammation-related protein biomarkers were determined after unblinding of participants. Measurements were performed by proximity extension assay using the Olink inflammation panel (Olink, Uppsala, Sweden) following manufacturer's instructions.

### **Stool microbiome**

Stool samples were collected at home at the day of the visit or within two days before or after the visit at baseline, 6 months, and 12 months, into tubes containing ethanol that were provided to the parents. The samples were brought to the visit, aliquoted, and stored at  $-80^{\circ}\text{C}$ . Alternatively, samples could be sent to the central laboratory with guaranteed delivery within 24 h. The bacterial component of the microbiome in each stool sample was analyzed by 16S rRNA gene compositional analysis, as previously described [13]. To generate 16S rDNA data, genomic bacterial DNA was extracted from the samples using MO BIO PowerMag Soil DNA Isolation Kit (Qiagen, Venlo, Netherlands). The 16S rDNA V4 region was amplified by PCR and sequenced in the MiSeq platform (Illumina, San Diego, CA, USA) using the  $2 \times 250$  bp paired-end protocol. The primers used for amplification contained adapters for MiSeq sequencing and dual-index barcodes so that the PCR products may be pooled and sequenced directly [14], targeting at least 10,000 reads per sample. The standard pipeline for processing and analysing the 16S rDNA gene data incorporated phylogenetic and alignment-based approaches to maximize data resolution. The read pairs were demultiplexed based on the unique molecular barcodes, and reads were merged using USEARCH v7.0.1001 [15]. 16S rRNA gene sequences were assigned into Operational Taxonomic Units (OTUs) or phylotypes at a similarity cut off value of 97% using the UPARSE pipeline. Abundances were recovered by mapping the demultiplexed reads to the UPARSE OTUs.

A subset of samples with sufficient material was selected for metagenomic whole genome shotgun (WGS) sequencing for deeper characterisation. Metagenomic WGS sequencing utilized the same extracted bacterial genomic DNA used for 16S rDNA compositional analysis. For WGS, individual libraries constructed from each

sample were loaded into the HiSeq platform (Illumina, San Diego, CA, USA) and sequenced using the 2x100 bp pair-end read protocol. The process of quality filtering, trimming and demultiplexing was carried out by in-house pipeline developed by assembling a number of publicly available tools such as Casava v1.8.3 (Illumina, San Diego, CA, USA) for the generation of fastqs, Trim Galore and cut adapt for adapter and quality trimming, and PRINSEQ for sample demultiplexing. In addition, Bowtie2 v2.2.1 [16] was used to map reads to custom databases for bacteria, viruses, human, and vectors. Reads whose highest identity match was not bacterial were removed from subsequent analysis. For bacterial reads, the highest identity match was chosen. If there were multiple top hits, the lowest common ancestor was determined.

### ***INS* genotyping**

Genomic DNA was amplified using primers (forward: 5'-GGTCTGTTCCAAGGGCCTTT-3'; biotinylated reverse: 5'-ATGGCAGAAGGACAGTGATCTGG-3') targeting rs689 of *INS* and the SsoFast EvaGreen Supermix on a CFX96 system (Bio-Rad, Hercules, CA; USA) according to manufacturer's protocol. Subsequently, genotyping of rs689 was performed by pyrosequencing on a PyroMark Q48 Autoprep using a sequencing primer (5'-CTCAGCCCTGCCTGT-3') and PyroMark Q48 Advanced Reagents (Qiagen, Venlo, Netherlands) according to manufacturer's protocol. Primer design and SNP analysis was carried out using the PyroMark Assay Design 2.0 and PyroMark Q48 Autoprep 2.4.2 Software (Qiagen, Venlo, Netherlands), respectively.

### **Recording of adverse events**

Throughout the study, the investigators recorded any adverse events using an adverse event clinical report form, regardless of the event's severity or relation to the study drug or study procedure. The families were instructed to note any symptoms of hypoglycaemic events such as trembling, sweating or impaired consciousness after study drug intake. Hypoglycaemia was defined as a blood glucose level <2.78 mmol/l (<50 mg/dl).

### **Statistical comparisons**

Additional analyses were planned to compare the immunological outcomes in children with the *INS* AA genotype and treatment effects on the stool microbiome. These and all other analyses were considered exploratory. An interaction between *INS* genotype and treatment on immunological responses to insulin was assessed using the Cox proportional hazards model. All analyses comparing responses in relation to monocyte CD169 expression, and analyses of cell frequency and plasma inflammatory markers were defined post-hoc. Spearman's correlation was calculated to assess the correlation between two continuous variables. Differences between groups' centroids defined by a principal component analysis (PCA) were assessed using a permutational multivariate analysis of variance (PERMANOVA). Analysis of age relationships to cell population frequencies included a linear mixed model with the cell frequencies as fixed effects and the children identification numbers as a random effect was fitted to predict the age. Stool analyses were conducted to characterize differences in the microbiome between the two treatment groups, including stratification by *INS* AA genotype and to determine the relationship of the microbiome to the immune responses in blood. Differences in beta diversity were visualized using a principal coordinates analysis (PCoA) followed by a PERMANOVA to assess differences between groups.

## References

- [1] Bonifacio E, Yu L, Williams AK, et al. (2010) Harmonization of glutamic acid decarboxylase and islet antigen-2 autoantibody assays for national institute of diabetes and digestive and kidney diseases consortia. *The Journal of clinical endocrinology and metabolism* 95: 3360-3367
- [2] Achenbach P, Lampasona V, Landherr U, et al. (2009) Autoantibodies to zinc transporter 8 and SLC30A8 genotype stratify type 1 diabetes risk. *Diabetologia* 52: 1881-1888
- [3] Törn C, Mueller PW, Schlosser M, Bonifacio E, Bingley PJ, Participating Laboratories (2008) Diabetes antibody standardization program: evaluation of assays for autoantibodies to glutamic acid decarboxylase and islet antigen-2. *Diabetologia* 51: 846–852
- [4] Lampasona V, Schlosser M, Mueller PW et al. (2011) Diabetes antibody standardization program: first proficiency evaluation of assays for autoantibodies to zinc transporter 8. *Clin Chem* 57:1693–1702
- [5] Schlosser M, Mueller PW, Törn C, Bonifacio E, Bingley PJ, Participating Laboratories (2010) Diabetes antibody standardization program: evaluation of assays for insulin autoantibodies. *Diabetologia* 53: 2611–2620
- [6] Naserke HE, Dozio N, Ziegler AG, Bonifacio E (1998) Comparison of a novel micro-assay for insulin autoantibodies with the conventional radiobinding assay. *Diabetologia* 41: 681-683
- [7] Williams AJ, Bingley PJ, Bonifacio E, Palmer JP, Gale EA (1997) A novel micro-assay for insulin autoantibodies. *Journal of autoimmunity* 10: 473-478
- [8] Koczwara K, Muller D, Achenbach P, Ziegler AG, Bonifacio E (2007) Identification of insulin autoantibodies of IgA isotype that preferentially target non-human insulin. *Clinical immunology* 124: 77-82
- [9] Bonifacio E, Ziegler AG, Klingensmith G, et al. (2015) Effects of high-dose oral insulin on immune responses in children at high risk for type 1 diabetes: the Pre-POINT randomized clinical trial. *Jama* 313: 1541-1549
- [10] Bonifacio E, Scirpoli M, Kredel K, Fuchtenbusch M, Ziegler AG (1999) Early autoantibody responses in prediabetes are IgG1 dominated and suggest antigen-specific regulation. *Journal of immunology* 163: 525-532
- [11] Becht E, McInnes L, Healy J, et al. (2018) Dimensionality reduction for visualizing single-cell data using UMAP. *Nat Biotechnol*
- [12] Buettner F, Natarajan KN, Casale FP, et al. (2015) Computational analysis of cell-to-cell heterogeneity in single-cell RNA-sequencing data reveals hidden subpopulations of cells. *Nat Biotechnol* 33: 155-160
- [13] Stewart CJ, Ajami NJ, O'Brien JL, et al. (2018) Temporal development of the gut microbiome in early childhood from the TEDDY study. *Nature* 562: 583-588
- [14] Caporaso JG, Lauber CL, Walters WA, et al. (2012) Ultra-high-throughput microbial community analysis on the Illumina HiSeq and MiSeq platforms. *ISME J* 6: 1621-1624
- [15] Edgar RC (2010) Search and clustering orders of magnitude faster than BLAST. *Bioinformatics* 26: 2460-2461
- [16] Langmead B, Salzberg SL (2012) Fast gapped-read alignment with Bowtie 2. *Nat Methods* 9: 357-359



## **ESM Results**

### **IgE**

IgE concentrations were above the reference limits in 3 children at the 12 months visit; all three children were in the placebo group. Children in the group receiving oral insulin showed no change in measured IgE (Median difference = 0.00). No child had IgE to insulin.

### **Laboratory analysis**

No significant changes in blood cell counts were observed. Monocyte count at baseline was the only parameter with values that were significantly different between the children in the placebo group and the oral insulin group (median 7% versus 5%;  $p = 0.0089$ , ESM Table 3a). No differences in blood chemistry values were observed except for GGT at 12 months with higher values in children in the placebo group (median 11 U/l vs 9 U/l,  $p = 0.0063$ , ESM Table 3b).

### **Adverse events**

A total of 114 adverse events were reported over a cumulative exposure period of 21.1 years in 21/21 children in the placebo group (5.64 events per year), and 181 adverse events were reported over a cumulative exposure period of 21.7 years in 22/22 children in the oral insulin group (8.38 events per year). The time to the first observed adverse event was similar between the two groups ( $p = 0.39$ ; log rank test). Infections were the most frequently reported adverse events (ESM Table 4). The severity of adverse events was similar between the two groups. There were six serious adverse events, four in the oral insulin group and two in the placebo group, none of which were considered related to the study drug. By system organ class, the frequency of skin and subcutaneous tissue disorders was greater in the oral insulin group (12 events in 8 children) than in the placebo group (1 event in 1 child;  $p = 0.01$ ; ESM Fig. 2). These included diaper rash, erythema, eczema, pruritus, and urticaria (ESM Table 4). The overall frequency of skin and subcutaneous tissue disorders among all reported adverse events was 4.3% and all of these adverse events were classified as mild (grade 1) and resolved.

### **Protocol violations**

There were 332 protocol deviations, all except one classified as minor. Most protocol violations were associated with missing values regarding single blood count parameters, missing parameters during blood glucose monitoring, missing parameters during the physical examination or an exceeded time window for study visits. The one protocol violation judged as major was the dispensation of a wrong medication package to one subject. However, after unblinding it turned out that this wrongly dispensed medication package was from the same medication group (placebo) the child had received in the trial.

ESM Table 1 | Treatment duration and adherence

|                                                             | Placebo                | Oral insulin<br>7.5 mg  | Oral insulin<br>22.5 mg | Oral insulin<br>67.5 mg |
|-------------------------------------------------------------|------------------------|-------------------------|-------------------------|-------------------------|
| Treatment duration per participant,<br>median (IQR), months | 11.95<br>(11.7 - 12.2) | 3.00<br>(2.9 - 3.3)     | 3.00<br>(2.9 - 3.2)     | 6.00<br>(5.8 - 6.2)     |
| Treatment duration cumulative;<br>months                    | 252.5                  | 66.7                    | 67.2                    | 126.2                   |
| Family reported adherence to<br>medication, median (IQR); % | 97.95<br>(94.2 - 99.0) | 98.85<br>(96.3 - 100.0) | 97.65<br>(94.1 - 98.9)  | 95.00<br>(89.0 - 98.7)  |

ESM Table 2 | Blood glucose, insulin and c-peptide measurements

| Visit | Treatment              | Time point<br>(minutes) | Glucose (mmol/l)<br>median (IQR) | AUC glucose<br>median (IQR) | Insulin (pmol/l)<br>median (IQR) | AUC insulin<br>median (IQR) | C-peptide (nmol/l)<br>median (IQR) | AUC c-peptide<br>median (IQR) |
|-------|------------------------|-------------------------|----------------------------------|-----------------------------|----------------------------------|-----------------------------|------------------------------------|-------------------------------|
| 1     | Placebo                | -10                     | 4.7 (4.3-5.1)                    | 10710                       | 36.1 (16.7-63.2)                 | 0.17                        | 0.56 (0.33-1.06)                   | 1.73                          |
|       |                        | 30                      | 5.3 (4.7-5.9)                    | (10380-11640)               | 56.3 (42.7-123.6)                | (0.12-0.33)                 | 0.73 (0.46-1.16)                   | (1.46-3.74)                   |
|       |                        | 60                      | 5.2 (4.8-5.3)                    |                             | 59.7 (26.4-120.0)                |                             | 0.58 (0.43-1.21)                   |                               |
|       |                        | 120                     | 4.9 (4.7-5.4)                    |                             | 49.7 (29.7-114.2)                |                             | 0.53 (0.43-1.09)                   |                               |
|       | Oral insulin<br>7.5mg  | -10                     | 4.9 (4.4-5.4)                    | 11205                       | 24.3 (5.6-52.8)                  | 0.11                        | 0.46 (0.20-0.63)                   | 1.58                          |
|       |                        | 30                      | 5.3 (4.7-6.2)                    | (10635-11730)               | 83.7 (26.2-163.2)                | (0.04-0.19)                 | 0.75 (0.52-1.07)                   | (0.92-2.06)                   |
|       |                        | 60                      | 5.1 (4.8-5.4)                    |                             | 50.0 (19.8-91.3)                 |                             | 0.73 (0.51-0.89)                   |                               |
|       |                        | 120                     | 5.1 (4.7-5.4)                    |                             | 37.2 (20.8-65.6)                 |                             | 0.60 (0.46-0.75)                   |                               |
| 2     | Placebo                | -10                     | 4.5 (4.1-5.0)                    | 11130                       | 18.1 (8.3-45.8)                  | 0.20                        | 0.57 (0.27-0.74)                   | 1.51                          |
|       |                        | 30                      | 5.0 (4.7-5.7)                    | (9945-11520)                | 49.3 (30.2-111.5)                | (0.10-0.40)                 | 0.73 (0.41-1.24)                   | (0.74-2.65)                   |
|       |                        | 60                      | 4.9 (4.7-5.4)                    |                             | 55.6 (22.2-153.5)                |                             | 0.66 (0.46-1.26)                   |                               |
|       |                        | 120                     | 5.1 (4.6-5.3)                    |                             | 70.5 (52.3-130.6)                |                             | 0.78 (0.62-1.00)                   |                               |
|       | Oral insulin<br>22.5mg | -10                     | 4.6 (4.2-4.9)                    | 10785                       | 38.2 (17.2-68.4)                 | 0.15                        | 0.46 (0.30-0.79)                   | 1.45                          |
|       |                        | 30                      | 5.1 (4.5-5.8)                    | (9915-11295)                | 101.0 (49.3-195)                 | (0.10-0.26)                 | 0.75 (0.50-1.26)                   | (0.84-2.05)                   |
|       |                        | 60                      | 5.1 (4.6-5.4)                    |                             | 75.7 (34.0-118.8)                |                             | 0.73 (0.40-1.05)                   |                               |
|       |                        | 120                     | 4.9 (4.6-5.4)                    |                             | 55.6 (33.5-132.5)                |                             | 0.60 (0.50-1.07)                   |                               |
| 3     | Placebo                | -10                     | 4.6 (4.3-5.1)                    | 11115                       | 26.4 (12.2-64.1)                 | 0.23                        | 0.46 (0.38-0.90)                   | 1.64                          |
|       |                        | 30                      | 5.5 (4.7-6.4)                    | (10613-12360)               | 119.8 (59.7-198)                 | (0.15-0.37)                 | 0.93 (0.60-1.39)                   | (0.94-2.11)                   |
|       |                        | 60                      | 5.1 (4.7-5.6)                    |                             | 88.2 (36.3-133.9)                |                             | 0.83 (0.50-1.18)                   |                               |
|       |                        | 120                     | 5.2 (4.6-5.6)                    |                             | 56.3 (34.0-112.8)                |                             | 0.60 (0.43-0.96)                   |                               |
|       | Oral insulin<br>67.5mg | -10                     | 4.6 (4.2-4.7)                    | 10718                       | 42.4 (23.3-106.9)                | 0.23                        | 0.53 (0.43-0.98)                   | 2.07                          |
|       |                        | 30                      | 5.0 (4.4-5.8)                    | (9840-11310)                | 93.4 (63.2-153.6)                | (0.16-0.23)                 | 0.85 (0.61-1.17)                   | (1.33-2.77)                   |
|       |                        | 60                      | 4.8 (4.4-5.3)                    |                             | 95.8 (35.4-118.4)                |                             | 0.96 (0.52-1.06)                   |                               |
|       |                        | 120                     | 5.2 (4.9-5.4)                    |                             | 66.7 (49.7-97.6)                 |                             | 0.79 (0.47-0.98)                   |                               |

ESM Table 3a | Full blood examination

| Parameter   | Unit                | Visit | Placebo             | Oral insulin                  |
|-------------|---------------------|-------|---------------------|-------------------------------|
|             |                     |       | median (IQR)        | median (IQR)                  |
| RBC         | 10 <sup>12</sup> /l | 1     | 4800 (4600-5000)    | 4600 (4400-4800)              |
|             |                     | 5     | 4800 (4700-4900)    | 4700 (4500-4800)              |
| Haemoglobin | g/l                 | 1     | 121.0 (118.0-129.0) | 120.0 (117.0-122.0)           |
|             |                     | 5     | 123.0 (119.0-125.0) | 122.0 (119.0-125.0)           |
| MCHC        | g/l                 | 1     | 340.0 (335.0-345.0) | 339.0 (334.0-350.0)           |
|             |                     | 5     | 34.1 (338.0-346.0)  | 34.5 (339-349)                |
| MCH         | pg                  | 1     | 25.9 (24.4-26.8)    | 26.2 (25.2-27.3)              |
|             |                     | 5     | 25.6 (24.9-26.6)    | 25.6 (25.2-26.2)              |
| MCV         | fl                  | 1     | 76.3 (72.8-78.0)    | 76.8 (73.9-79.8)              |
|             |                     | 5     | 75.3 (72.8-77.0)    | 74.2 (72.8-77.2)              |
| Haematocrit | %                   | 1     | 0.36 (0.38-0.38)    | 0.35 (0.35-0.37)              |
|             |                     | 5     | 0.36 (0.35-0.37)    | 0.35 (0.34-0.37)              |
| WBC         | 10 <sup>9</sup> /l  | 1     | 9.6 (8.6-11.6)      | 9.0 (7.4-11.0)                |
|             |                     | 5     | 8.2 (6.2-9.7)       | 8.3 (6.6-10.3)                |
| Platelets   | 10 <sup>9</sup> /l  | 1     | 397.0 (332.0-462.0) | 340.0 (310.0-444.0)           |
|             |                     | 5     | 354.0 (325.0-430.0) | 336.0 (277.0-404.0)           |
| Eosinophils | %                   | 1     | 0.04 (0.01-0.06)    | 0.03 (0.02-0.05)              |
|             |                     | 5     | 0.03 (0.01-0.04)    | 0.04 (0.02-0.07)              |
| Basophils   | %                   | 1     | 0.001 (0.001-0.01)  | 0.001 (0.001-0.01)            |
|             |                     | 5     | 0.01 (0.001-0.01)   | 0.01 (0.001-0.01)             |
| Lymphocytes | %                   | 1     | 0.51 (0.40-0.54)    | 0.56 (0.49-0.62)              |
|             |                     | 5     | 0.49 (0.39-0.58)    | 0.51 (0.44-0.59)              |
| Monocytes*  | %                   | 1     | 0.07 (0.06-0.10)*   | 0.05 (0.02-0.06) <sup>a</sup> |
|             |                     | 5     | 0.08 (0.06-0.10)    | 0.06 (0.05-0.07)              |

<sup>a</sup> Monocyte count at baseline is significantly different between the two groups;  $p = 0.0089$ , Mann-Whitney U Test

ESM Table 3b | Blood chemistry

| Parameter  | Unit   | Visit | Placebo<br>median (IQR) | Oral insulin<br>median (IQR)  |
|------------|--------|-------|-------------------------|-------------------------------|
| Sodium     | mmol/l | 1     | 137.5 (137.0-139.0)     | 138.0 (136.0-138.0)           |
|            |        | 5     | 140.0 (139.0-141.0)     | 140.0 (138.0-141.0)           |
| Potassium  | mmol/l | 1     | 4.4 (4.0-4.8)           | 4.6 (4.0-4.9)                 |
|            |        | 5     | 4.4 (4.3-4.6)           | 4.4 (4.2-4.4)                 |
| GOT        | μkat/l | 1     | 0.74 (0.65-0.83)        | 0.76 (0.67-0.90)              |
|            |        | 5     | 0.73 (0.65-0.85)        | 0.72 (0.65-0.78)              |
| GPT        | μkat/l | 1     | 0.32 (0.30-0.43)        | 0.35 (0.30-25.0)              |
|            |        | 5     | 0.33 (0.30-0.42)        | 0.33 (0.28-0.33)              |
| GGT        | μkat/l | 1     | 0.18 (0.15-0.20)        | 0.15 (0.13-0.18)              |
|            |        | 5     | 11.0 (0.15-0.22)        | 0.15 (0.13-0.17) <sup>a</sup> |
| AP         | μkat/l | 1     | 4.39 (3.86-5.79)        | 4.17 (3.81-4.54)              |
|            |        | 5     | 4.76 (4.07-5.66)        | 4.02 (3.52-4.94)              |
| Albumin    | g/l    | 1     | 41.0 (38.0-43.0)        | 41.0 (38.0-43.0)              |
|            |        | 5     | 44.0 (43.0-46.0)        | 44.0 (43.0-46.0)              |
| Creatinine | μmol/l | 1     | 35.36 (26.52-35.36)     | 35.36 (26.52-35.36)           |
|            |        | 5     | 26.52 (26.52-26.52)     | 26.52 (17.68-26.52)           |

<sup>a</sup> GGT at 12 months is significantly different between the two groups;

$p = 0.0063$ , Mann-Whitney U Test

ESM Table 4a | Adverse advents (AEs) and severity grade

| System Organ Class                         | Placebo           |                        | Oral insulin      |                        | p-value |
|--------------------------------------------|-------------------|------------------------|-------------------|------------------------|---------|
|                                            | Events<br>(N=114) | Participants<br>(N=21) | Events<br>(N=181) | Participants<br>(N=22) |         |
|                                            | n                 | n (%)                  | n                 | n (%)                  |         |
| Blood and lymphatic system disorders       | 0                 | 0 (0.0)                | 2                 | 2 (9.1)                |         |
| Congenital, familial and genetic disorders | 0                 | 0 (0.0)                | 1                 | 1 (4.5)                |         |
| Gastrointestinal disorders                 | 12                | 8 (38.1)               | 30                | 13 (59.1)              | 0.22    |
| General disorders                          | 18                | 10 (47.6)              | 30                | 14 (63.6)              | 0.35    |
| Immune system disorders                    | 1                 | 1 (4.8)                | 0                 | 0 (0.0)                |         |
| Infections and infestations                | 72                | 17 (81.0)              | 77                | 20 (90.9)              | 0.54    |
| Injury poisoning                           | 0                 | 0 (0.0)                | 4                 | 4 (18.2)               |         |
| Investigations                             | 1                 | 1 (4.8)                | 1                 | 1 (4.5)                |         |
| Metabolism and nutrition disorders         | 0                 | 0 (0.0)                | 2                 | 2 (9.1)                |         |
| Respiratory, thoracic disorders            | 8                 | 5 (23.8)               | 20                | 8 (36.4)               | 0.17    |
| Skin and subcutaneous tissue disorders     | 1                 | 1 (4.8)                | 12                | 8 (36.4)               | 0.01    |
| Surgical and medical procedures            | 1                 | 1 (4.8)                | 2                 | 2 (9.1)                |         |
| AE severity (grade)                        |                   |                        |                   |                        |         |
| None reported                              |                   | 2 (9.5)                |                   | 1 (4.6)                |         |
| Mild                                       | 109               | 16 (76.2)              | 170               | 15 (68.2)              |         |
| Moderate                                   | 3                 | 2 (9.5)                | 9                 | 5 (22.7)               |         |
| Severe and undesirable                     | 2                 | 1 (4.8)                | 2                 | 1 (4.6)                |         |
| Life-threatening or disabling              | 0                 | 0 (0.0)                | 0                 | 0 (0.0)                |         |
| Death                                      | 0                 | 0 (0.0)                | 0                 | 0 (0.0)                |         |

ESM Table 4b | Adverse events of the system organ class "skin and subcutaneous tissue disorders

| Participant | Treatment    | Event       | Severity |
|-------------|--------------|-------------|----------|
| 1           | Oral insulin | Pruritus    | Mild     |
| 2           | Oral insulin | Erythema    | Mild     |
|             | Oral insulin | Erythema    | Mild     |
| 3           | Oral insulin | Exanthema   | Mild     |
| 4           | Placebo      | Eczema      | Mild     |
| 5           | Oral insulin | Urticaria   | Mild     |
|             | Oral insulin | Urticaria   | Mild     |
| 6           | Oral insulin | Diaper rash | Mild     |
| 7           | Oral insulin | Diaper rash | Mild     |
|             | Oral insulin | Diaper rash | Mild     |
|             | Oral insulin | Diaper rash | Mild     |
| 8           | Oral insulin | Eczema      | Mild     |
| 9           | Oral insulin | Eczema      | Mild     |

ESM Table 5 | Maximum antibody and CD4<sup>+</sup> T cell response to insulin during treatment in participants carrying the *INS AA* genotype

| Treatment group | IgG anti-insulin (max. increase from baseline) | Saliva IgA anti- insulin (max. fold over baseline) | IAA (max. units; fold over baseline*) | Antibody response | CD4 <sup>+</sup> T cell response (max. SI; fold over baseline**) | T cell response |
|-----------------|------------------------------------------------|----------------------------------------------------|---------------------------------------|-------------------|------------------------------------------------------------------|-----------------|
| Placebo         | 7.8                                            | 1.1                                                | 0.8                                   | No                | 5.24 ; <b>9.5</b>                                                | <b>Yes</b>      |
| Placebo         | 1.9                                            | 0.9                                                | 0.6                                   | No                | 7.03 ; 1.1                                                       | No              |
| Placebo         | 0.4                                            | 1.2                                                | 0.8                                   | No                | 4.33 ; <b>8.9</b>                                                | <b>Yes</b>      |
| Placebo         | 4.4                                            | 1.2                                                | 1.1                                   | No                | 1.54                                                             | No              |
| Placebo         | <b>27.9</b>                                    | 1.7                                                | 0.8                                   | <b>Yes</b>        | 1.58                                                             | No              |
| Placebo         | 3.4                                            | 1.4                                                | 0.9                                   | No                | 3.65 ; <b>2.1</b>                                                | <b>Yes</b>      |
| Placebo         | 8.4                                            | 0.8                                                | 0.7                                   | No                | 3.06 ; <b>3.2</b>                                                | <b>Yes</b>      |
| Placebo         | 8.1                                            | 1.3                                                | 0.5                                   | No                | 1.01                                                             | No              |
| Placebo         | 4.2                                            | 1.8                                                | 0.6                                   | No                | 1.61                                                             | No              |
| Placebo         | <b>23.2</b>                                    | 1.2                                                | 0.3                                   | <b>Yes</b>        | 1.79                                                             | No              |
| Placebo         | 3.2                                            | 1.4                                                | 0.7                                   | No                | 3.10 ; <b>4.1</b>                                                | <b>Yes</b>      |
| Insulin         | 6.2                                            | 1.2                                                | 0.9                                   | No                | 1.98                                                             | No              |
| Insulin         | <b>16.2</b>                                    | <b>5.9</b>                                         | 0.6                                   | <b>Yes</b>        | 14.16 ; <b>10.5</b>                                              | <b>Yes</b>      |
| Insulin         | <b>23.4</b>                                    | 1.3                                                | 1.0                                   | <b>Yes</b>        | 2.92                                                             | No              |
| Insulin         | 0.4                                            | 0.9                                                | 2.8 ; <b>55.8</b>                     | <b>Yes</b>        | 1.67                                                             | No              |
| Insulin         | <b>10.1</b>                                    | n.a.                                               | 0.7                                   | <b>Yes</b>        | 1.45                                                             | No              |
| Insulin         | <b>13.1</b>                                    | 1.5                                                | 0.9                                   | <b>Yes</b>        | 3.44 ; <b>2.6</b>                                                | <b>Yes</b>      |
| Insulin         | <b>10.3</b>                                    | 1.2                                                | 1.0                                   | <b>Yes</b>        | 6.16 ; <b>3.6</b>                                                | <b>Yes</b>      |
| Insulin         | 8.2                                            | <b>5.0</b>                                         | 2.2 ; 1.1                             | <b>Yes</b>        | 1.09                                                             | No              |
| Insulin         | <b>19.5</b>                                    | 1.5                                                | 0.6                                   | <b>Yes</b>        | 0.82                                                             | No              |
| Insulin         | 3.1                                            | 0.9                                                | 0.4                                   | No                | 3.95 ; <b>4.9</b>                                                | <b>Yes</b>      |
| Insulin         | 6.5                                            | 1.9                                                | 0.3                                   | No                | 1.59                                                             | No              |

\*Fold over baseline is shown if IAA response >1.5 units

\*\*Fold over baseline is shown if CD4<sup>+</sup> T cell response is >3 SI



ESM Table 6 | Significant correlations between cell population frequencies, CD169<sup>+</sup> monocytes, plasma inflammatory markers, and age

| Variable 1              | Variable 2 | Spearman's Rho | p-value  | Adjusted p-value |
|-------------------------|------------|----------------|----------|------------------|
| Memory CD4              | Age        | 0.64           | 9.59E-25 | 1.36E-21         |
| Memory Treg             | Age        | 0.44           | 4.72E-11 | 6.52E-09         |
| CD4                     | Age        | -0.43          | 9.43E-11 | 1.16E-08         |
| Memory CD8              | Age        | 0.41           | 8.15E-10 | 8.25E-08         |
| Age                     | IL.10RB    | -0.60          | 1.59E-08 | 1.18E-06         |
| Intermediate monocytes  | CD169      | 0.36           | 1.25E-07 | 7.54E-06         |
| Monocytes               | Age        | 0.34           | 5.46E-07 | 2.69E-05         |
| Age                     | CD5        | -0.54          | 7.61E-07 | 3.66E-05         |
| Memory CD4              | DNER       | -0.50          | 5.24E-06 | 2.01E-04         |
| Age                     | FGF.23     | -0.50          | 6.21E-06 | 2.30E-04         |
| CD169                   | CXCL10     | 0.49           | 9.43E-06 | 3.22E-04         |
| Activated CD4           | CD169      | 0.30           | 9.79E-06 | 3.31E-04         |
| Age                     | CCL4       | -0.47          | 2.85E-05 | 8.21E-04         |
| Age                     | FGF.21     | -0.47          | 2.97E-05 | 8.41E-04         |
| CD8                     | Age        | 0.28           | 4.29E-05 | 1.15E-03         |
| Intermediate monocytes  | IL10       | 0.45           | 4.77E-05 | 1.25E-03         |
| Activated CD4           | CXCL10     | 0.45           | 6.35E-05 | 1.61E-03         |
| CD4                     | CD5        | 0.44           | 7.16E-05 | 1.78E-03         |
| Memory CD8              | DNER       | -0.44          | 7.74E-05 | 1.90E-03         |
| Activated CD8           | TNF        | 0.44           | 8.78E-05 | 2.13E-03         |
| Classical monocytes     | Age        | 0.27           | 8.85E-05 | 2.14E-03         |
| Monocytes               | IL6        | 0.43           | 1.25E-04 | 2.77E-03         |
| Activated CD8           | CD169      | 0.26           | 1.28E-04 | 2.79E-03         |
| Activated CD8           | PD.L1      | 0.43           | 1.48E-04 | 3.09E-03         |
| Non-classical monocytes | Age        | -0.26          | 1.58E-04 | 3.28E-03         |
| CD169                   | IL6        | 0.42           | 1.90E-04 | 3.78E-03         |
| Memory Treg             | CD5        | -0.42          | 2.13E-04 | 4.08E-03         |
| Memory CD4              | FGF.23     | -0.41          | 2.89E-04 | 5.27E-03         |
| Age                     | CX3CL1     | -0.41          | 2.90E-04 | 5.27E-03         |
| CD169                   | CSF.1      | 0.41           | 3.04E-04 | 5.41E-03         |
| Classical monocytes     | FGF.5      | 0.41           | 3.23E-04 | 5.64E-03         |
| CD8                     | MCP.1      | -0.41          | 3.25E-04 | 5.64E-03         |
| Non-classical monocytes | FGF.5      | -0.41          | 3.31E-04 | 5.70E-03         |
| Age                     | IL.17C     | -0.41          | 3.37E-04 | 5.78E-03         |
| Monocytes               | DNER       | -0.41          | 3.43E-04 | 5.86E-03         |
| Memory CD4              | CCL4       | -0.40          | 3.51E-04 | 5.94E-03         |
| Memory CD4              | IL.10RB    | -0.40          | 3.93E-04 | 6.50E-03         |
| Activated CD8           | IFN.gamma  | 0.40           | 4.03E-04 | 6.60E-03         |
| Memory CD4              | CD5        | -0.40          | 4.27E-04 | 6.94E-03         |
| CD3                     | CCL19      | -0.39          | 5.70E-04 | 8.78E-03         |
| Activated CD4           | IFN.gamma  | 0.39           | 6.32E-04 | 9.35E-03         |
| CD169                   | IFN.gamma  | 0.39           | 6.47E-04 | 9.54E-03         |
| Monocytes               | SCF        | -0.38          | 7.36E-04 | 1.05E-02         |

| Variable 1              | Variable 2 | Spearman's Rho | p-value  | Adjusted p-value |
|-------------------------|------------|----------------|----------|------------------|
| Classical monocytes     | OSM        | -0.38          | 8.86E-04 | 1.20E-02         |
| Age                     | MCP.3      | -0.38          | 9.60E-04 | 1.28E-02         |
| CD8                     | CD5        | -0.37          | 9.97E-04 | 1.32E-02         |
| Activated CD8           | CXCL10     | 0.37           | 1.04E-03 | 1.36E-02         |
| CD3                     | OPG        | -0.37          | 1.06E-03 | 1.38E-02         |
| CD169                   | MCP.2      | 0.37           | 1.13E-03 | 1.47E-02         |
| CD4                     | MCP.1      | 0.37           | 1.17E-03 | 1.49E-02         |
| Monocytes               | CCL19      | 0.37           | 1.19E-03 | 1.51E-02         |
| CD169                   | IL10       | 0.37           | 1.26E-03 | 1.56E-02         |
| Non-classical monocytes | CCL4       | 0.37           | 1.29E-03 | 1.58E-02         |
| CD8                     | DNER       | -0.36          | 1.44E-03 | 1.71E-02         |
| CD4                     | CX3CL1     | 0.36           | 1.71E-03 | 1.96E-02         |
| Memory Treg             | DNER       | -0.36          | 1.77E-03 | 1.99E-02         |
| Intermediate monocytes  | CXCL10     | 0.36           | 1.79E-03 | 2.01E-02         |
| CD4                     | DNER       | 0.36           | 1.85E-03 | 2.06E-02         |
| Memory CD4              | IL.17C     | -0.35          | 2.09E-03 | 2.23E-02         |
| Memory CD8              | FGF.23     | -0.35          | 2.31E-03 | 2.40E-02         |
| CD169                   | CXCL11     | 0.35           | 2.34E-03 | 2.42E-02         |
| CD169                   | LIF        | 0.35           | 2.42E-03 | 2.50E-02         |
| Age                     | DNER       | -0.35          | 2.48E-03 | 2.54E-02         |
| Monocytes               | 4E.BP1     | -0.34          | 2.71E-03 | 2.70E-02         |
| Classical monocytes     | CCL4       | -0.34          | 2.81E-03 | 2.78E-02         |
| Memory CD8              | CX3CL1     | -0.34          | 2.81E-03 | 2.78E-02         |
| CD169                   | CDCP1      | 0.34           | 2.84E-03 | 2.80E-02         |
| Treg                    | CCL19      | 0.34           | 2.91E-03 | 2.84E-02         |
| Non-classical monocytes | OSM        | 0.34           | 2.95E-03 | 2.88E-02         |
| Memory Treg             | CD169      | -0.20          | 3.15E-03 | 3.01E-02         |
| Age                     | TGF.alpha  | -0.34          | 3.29E-03 | 3.09E-02         |
| Monocytes               | PD.L1      | 0.34           | 3.47E-03 | 3.23E-02         |
| CD169                   | PD.L1      | 0.33           | 3.78E-03 | 3.45E-02         |
| Age                     | IL.12B     | -0.33          | 3.81E-03 | 3.46E-02         |
| Memory CD4              | AXIN1      | 0.33           | 3.91E-03 | 3.52E-02         |
| Memory Treg             | AXIN1      | 0.33           | 4.22E-03 | 3.73E-02         |
| Memory CD8              | CXCL10     | 0.33           | 4.32E-03 | 3.79E-02         |
| Activated CD8           | CSF.1      | 0.33           | 4.52E-03 | 3.90E-02         |
| Memory CD4              | SCF        | -0.33          | 4.65E-03 | 3.98E-02         |
| CD4                     | SCF        | 0.32           | 4.85E-03 | 4.12E-02         |
| Memory CD4              | MCP.3      | -0.32          | 5.08E-03 | 4.27E-02         |
| Intermediate monocytes  | IL6        | 0.32           | 5.16E-03 | 4.33E-02         |
| CD3                     | EN.RAGE    | -0.32          | 5.30E-03 | 4.42E-02         |
| Monocytes               | IL10       | 0.32           | 5.32E-03 | 4.43E-02         |
| Activated CD8           | CDCP1      | 0.32           | 5.50E-03 | 4.53E-02         |
| CD4                     | MCP.3      | 0.32           | 5.58E-03 | 4.58E-02         |
| Memory Treg             | IL.17C     | -0.32          | 5.63E-03 | 4.61E-02         |
| Age                     | TNF        | 0.32           | 5.67E-03 | 4.63E-02         |

| Variable 1          | Variable 2 | Spearman's Rho | p-value  | Adjusted p-value |
|---------------------|------------|----------------|----------|------------------|
| Activated CD8       | IL10       | 0.32           | 5.70E-03 | 4.64E-02         |
| Activated CD8       | IL.18R1    | 0.32           | 5.91E-03 | 4.76E-02         |
| Classical monocytes | HGF        | -0.32          | 5.98E-03 | 4.80E-02         |
| Memory CD4          | FGF.21     | -0.32          | 6.07E-03 | 4.84E-02         |
| Age                 | PD.L1      | 0.32           | 6.15E-03 | 4.89E-02         |

ESM Table 7 | List of genes and primers used for single cell gene expression profiling

| Gene          | Preamplification      |                       | qPCR                  |                       |
|---------------|-----------------------|-----------------------|-----------------------|-----------------------|
|               | 5'                    | 3'                    | 5'                    | 3'                    |
| <i>AHR</i>    | TAAAGCCAATCCCAGCTGAA  | GACGCTGAGCCTAAGAACTGA | TAAAGCCAATCCCAGCTGAA  | GACGCTGAGCCTAAGAACTGA |
| <i>AURKA</i>  | GTCACAAGCCGGTTCAGAAT  | TTTGATGCCAGTTCCTCCTC  | GTCACAAGCCGGTTCAGAAT  | TTTGATGCCAGTTCCTCCTC  |
| <i>BCL2</i>   | GAGTTCGGTGGGGTCATGT   | ACAGCCAGGAGAAATCAAACA | GAGTTCGGTGGGGTCATGT   | ACAGCCAGGAGAAATCAAACA |
| <i>BCL6</i>   | AGCCGTGAGCAGTTTAGAGC  | AAGTCCAGGAGGATGCAGAA  | AGCCGTGAGCAGTTTAGAGC  | AAGTCCAGGAGGATGCAGAA  |
| <i>CCL4</i>   | CTGTCCTGTCTCTCCTCATGC | GCTTGCTTCTTTTGGTTTGG  | TAGCTGCCTTCTGCTCTCCA  | GCTTGCTTCTTTTGGTTTGG  |
| <i>CCL5</i>   | CGCTGTCATCCTCATTGCTA  | ACACACTTGGCGGTTCTTTC  | ATCTGCCTCCCATATTCTCT  | ACACACTTGGCGGTTCTTTC  |
| <i>CCR4</i>   | CAAATACAAGCGGCTCAGGT  | AGCCCACCAAGTACATCCAG  | CAAATACAAGCGGCTCAGGT  | AGCCCACCAAGTACATCCAG  |
| <i>CCR5</i>   | GGCCATCTCTGACCTGTTTTT | AAACACAGCATGGACGACAG  | GTCCCCTTCTGGGCTCACTA  | AAACACAGCATGGACGACAG  |
| <i>CCR6</i>   | TCAGCGATGTTTTCGACTCC  | CACCAGAATATTCCCCAGGA  | TCAGCGATGTTTTCGACTCC  | CACCAGAATATTCCCCAGGA  |
| <i>CCR7</i>   | CAATGAAAAGCGTGCTGGT   | ATAGGGAGGAACCAGGCTTT  | GTGGTGGCTCTCCTTGTCT   | ATAGGGAGGAACCAGGCTTT  |
| <i>CD247</i>  | GCACAGTTGCCGATTACAGA  | TCAGGAACAAGGCAGTGAGA  | GCACAGTTGCCGATTACAGA  | TCAGGAACAAGGCAGTGAGA  |
| <i>CD27</i>   | CACTACTGGGCTCAGGGAAA  | GCGAACGAGAAGACCAGAGT  | CTCGTGAAGGACTGTGACCA  | GCGAACGAGAAGACCAGAGT  |
| <i>CD3e</i>   | GCACTCACTGGAGAGTTCTGG | CCTCATCACCGCCTATGTTT  | GCACTCACTGGAGAGTTCTGG | CCTCATCACCGCCTATGTTT  |
| <i>CD4</i>    | ACCGGGGAGTCCCTTTTAG   | CATTCAGCTTGATGGACCT   | ACCGGGGAGTCCCTTTTAG   | CATTCAGCTTGATGGACCT   |
| <i>CD40LG</i> | ATTGGGTCAGCACTTTTTGC  | TTCACAAAGCCTTCAAAGTGG | ATTGGGTCAGCACTTTTTGC  | TTCACAAAGCCTTCAAAGTGG |
| <i>CD52</i>   | GCGCTTCCTCTTCCCTCTAC  | CTGAAGCAGAAGAGGTGGATT | GCGCTTCCTCTTCCCTCTAC  | CTGAAGCAGAAGAGGTGGATT |
| <i>CD69</i>   | ATCCGGAGAGTGGACAAGAA  | TGGTGAAGACCACATTCA    | ATCCGGAGAGTGGACAAGAA  | TGGTGAAGACCACATTCA    |
| <i>CD8B</i>   | GCTGGACTTCGCCTGTGATAT | TTGTCTCCCGATTTGACCAC  | GCTGGACTTCGCCTGTGATAT | TTGTCTCCCGATTTGACCAC  |
| <i>CSF2</i>   | CACTGCTGCTGAGATGAATGA | AGGGCAGTGCTGCTTGTAGT  | CACTGCTGCTGAGATGAATGA | AGGGCAGTGCTGCTTGTAGT  |
| <i>CTLA4</i>  | TGACAGCCAGGTGACTGAAG  | GTTGCCTATGCCAGGTAGT   | TGGGGAATGAGTTGACCTTC  | GTTGCCTATGCCAGGTAGT   |
| <i>EGR1</i>   | CACCTGACCGCAGAGTCTTT  | AGCGGCCAGTATAGGTGATG  | CACCTGACCGCAGAGTCTTT  | AGCGGCCAGTATAGGTGATG  |
| <i>Egr2</i>   | TGGAGAGAAGAGGTCGTTGG  | GTTGAAGCTGGGGAAGTGAC  | TGGAGAGAAGAGGTCGTTGG  | GTTGAAGCTGGGGAAGTGAC  |
| <i>EOMES</i>  | CACAAATACCAACCCCGACT  | GGGACAATCTGATGGGATGA  | CACAAATACCAACCCCGACT  | GGGACAATCTGATGGGATGA  |
| <i>FAS</i>    | CAAGGGATTGGAATTGAGGA  | TGGAAGAAAAATGGGCTTTG  | ATGGCCAATTCTGCCATAAG  | TGGAAGAAAAATGGGCTTTG  |
| <i>FASLG</i>  | GGGATGTTTCAGCTCTTCCA  | CAGAGGCATGGACCTTGAGT  | CAGAAGGAGCTGGCAGAACT  | CAGAGGCATGGACCTTGAGT  |
| <i>FASLG</i>  | GGCCTGTGTCTCCTTGTGAT  | GTGGCCTATTTGCTTCTCCA  | GGGATGTTTCAGCTCTTCCA  | GTGGCCTATTTGCTTCTCCA  |
| <i>FOSI</i>   | CCGGGGATAGCCTCTCTTAC  | ACTGGTCGAGATGGCAGTG   | ACTACCACTCACCCGCAGAC  | ACTGGTCGAGATGGCAGTG   |
| <i>FOSL2</i>  | CAGCAGAAATTCCGGGTAGA  | GGTATGGGTTGGACATGGAG  | CAGCAGAAATTCCGGGTAGA  | GGTATGGGTTGGACATGGAG  |

| Gene           | Preamplification       |                        | qPCR                   |                        |
|----------------|------------------------|------------------------|------------------------|------------------------|
|                | 5'                     | 3'                     | 5'                     | 3'                     |
| <i>FOXO1</i>   | AAGAGCGTGCCCTACTTCAA   | TTCCTTCATTCTGCACACGA   | AAGAGCGTGCCCTACTTCAA   | TTCCTTCATTCTGCACACGA   |
| <i>FOXP3</i>   | GTAGCCATGGAAACAGCACAT  | GCGTGTGAACCAAGTGGTAGAT | ACATTCCCAGAGTTCCTCCAC  | GCGTGTGAACCAAGTGGTAGAT |
| <i>GZMA</i>    | GAACAAAAGGTCCCAGGTCA   | TTTTTGCTTTTTCCATCAGC   | GAACAAAAGGTCCCAGGTCA   | TTTTTGCTTTTTCCATCAGC   |
| <i>GZMB</i>    | GGTGGCTTCCCTGATACGAGA  | GCTGCAGTAGCATGATGTCTG  | ACTGTTGGGGAAGCTCCATA   | GCTGCAGTAGCATGATGTCTG  |
| <i>GZMH</i>    | CAGCCATTCTCCTCCTGT     | GAGCAGCTGTCAGCACAAAAG  | TCCTCCTGTTGGCCTTTCTT   | GAGCAGCTGTCAGCACAAAAG  |
| <i>H2AFX</i>   | TACCTCACCGCTGAGATCCT   | AGCTTGTTGAGCTCCTCGTC   | TACCTCACCGCTGAGATCCT   | GTTGAGCTCCTCGTCGTTG    |
| <i>HMGB1</i>   | AAGCACCCAGATGCTTCAGT   | TCCGCTTTTGCCATATCTTC   | AAGCACCCAGATGCTTCAGT   | TCCGCTTTTGCCATATCTTC   |
| <i>ICOS</i>    | GGACCATTCTCATGCCAACT   | TCGTGCACACTGGATGAATA   | GGTTACCCATAGGATGTGCAG  | TCGTGCACACTGGATGAATA   |
| <i>IFNA1</i>   | ACCCACAGCCTGGATAACAG   | ACTGGTTGCCATCAAACCTCC  | ACCCACAGCCTGGATAACAG   | ACTGGTTGCCATCAAACCTCC  |
| <i>IFNAR1</i>  | TGAGTCTGTCGGGAATGTGA   | TGCGAAATGGTGTAATGAGTC  | TGAGTCTGTCGGGAATGTGA   | TGCGAAATGGTGTAATGAGTC  |
| <i>IFR8</i>    | ACGAGGTTACGCTGTGCTTT   | TGATCAGCTCGTCGATTTCA   | ACGAGGTTACGCTGTGCTTT   | TGATCAGCTCGTCGATTTCA   |
| <i>IKZF2</i>   | CGAAAGGGAGCACTCCAATA   | ATGGCCCCTGATCTCATCT    | CGAAAGGGAGCACTCCAATA   | ATGGCCCCTGATCTCATCT    |
| <i>IL10</i>    | TGCTGGAGGACTTTAAGGGTTA | GCCTTGCTCTTGTTTTACAG   | TTTAAGGGTTACCTGGGTTGC  | GCCTTGCTCTTGTTTTACAG   |
| <i>IL13</i>    | GGTCAACATCACCCAGAACC   | TTTACAAACTGGGCCACCTC   | GTA CTGTGCAGCCCTGGAAT  | TTTACAAACTGGGCCACCTC   |
| <i>IL17A</i>   | TGGGAAGACCTCATTGGTGT   | CCGGTTATGGATGTTCAAGT   | TGGGAAGACCTCATTGGTGT   | CCGGTTATGGATGTTCAAGT   |
| <i>IL17f</i>   | TCCAAAAGCCTGAGAGTTGC   | ATGCAGCCCAAGTTCCTACA   | GCCTGTGCCAGGAGGTAGTA   | ATGCAGCCCAAGTTCCTACA   |
| <i>IL18RAP</i> | TTGCAGGAGAGCGAATTA     | GGTGAGAGTCGATTTCTGTGG  | TTGCAGGAGAGCGAATTA     | GGTGAGAGTCGATTTCTGTGG  |
| <i>IL2</i>     | TGGAGCATTTACTGCTGGATT  | GCACTTCCTCCAGAGGTTTG   | TGGAGCATTTACTGCTGGATT  | GCACTTCCTCCAGAGGTTTG   |
| <i>IL21</i>    | TCGCCACATGATTAGAATGC   | AAGCAGGAAAAAGCTGACCA   | TCGCCACATGATTAGAATGC   | AAGCAGGAAAAAGCTGACCA   |
| <i>IL22</i>    | TCCAGCAGCCCTATATCACC   | GTTCAGCACCTGCTTCATCA   | TCCAGCAGCCCTATATCACC   | GTTCAGCACCTGCTTCATCA   |
| <i>IL2RA</i>   | ACTGCTCACGTTTCATCATGG  | CGGAAACCTCTCTTGCATTC   | ACTGCTCACGTTTCATCATGG  | CGGAAACCTCTCTTGCATTC   |
| <i>IL4</i>     | TGCCTCCAAGAACAACACTG   | CTCTGGTTGGCTTCCTTCAC   | GGCAGTTCTACAGCCACCAT   | CTCTGGTTGGCTTCCTTCAC   |
| <i>IL6R</i>    | CTCAGTGTACCTGGCAAGA    | CCTTGACCATCCATGTTGTG   | CTCAGTGTACCTGGCAAGA    | CCTTGACCATCCATGTTGTG   |
| <i>IL7R</i>    | CTGAGGCTCCTTTTGACCTG   | CTGCAGGAGTGTGAGCTTTG   | CTGAGGCTCCTTTTGACCTG   | CTGCAGGAGTGTGAGCTTTG   |
| <i>IL9</i>     | CTCATCAACAAGATGCAGGAAG | TGTTTGCATGGTGGTATTGG   | CTCATCAACAAGATGCAGGAAG | TGTTTGCATGGTGGTATTGG   |
| <i>INFg</i>    | CTGTTACTGCCAGGACCCAT   | TGGATGCTCTGGTCATCTTT   | GGTCATTAGATGTAGCGGA    | TGGATGCTCTGGTCATCTTT   |
| <i>IRF3</i>    | GTTCTGTGTGGGGGAGTCAT   | CCTTGTACTGGTCCGAGGTG   | GTTCTGTGTGGGGGAGTCAT   | CCTTGTACTGGTCCGAGGTG   |
| <i>JAK3</i>    | GAATGGTGCCAGCTCTATG    | TGAAAGTCCCTCTGCTGGTC   | GAATGGTGCCAGCTCTATG    | TGAAAGTCCCTCTGCTGGTC   |

| Gene            | Preamplification      |                       | qPCR                  |                      |
|-----------------|-----------------------|-----------------------|-----------------------|----------------------|
|                 | 5'                    | 3'                    | 5'                    | 3'                   |
| <i>JUN</i>      | CCCCAAGATCCTGAAACAGA  | CCGTTGCTGGACTGGATTAT  | CCCCAAGATCCTGAAACAGA  | CCGTTGCTGGACTGGATTAT |
| <i>MAF</i>      | GGACGCGTACAAGGAGAAAT  | GCTTCCAAAATGTGGCGTAT  | GGACGCGTACAAGGAGAAAT  | GCTTCCAAAATGTGGCGTAT |
| <i>NAB2</i>     | CATCTATGGCCGTTTCGACT  | GTGCTCTCTCGGGCTACTTG  | CATCTATGGCCGTTTCGACT  | GTGCTCTCTCGGGCTACTTG |
| <i>PRF</i>      | AACTTTGCAGCCCAGAAGAC  | GGGTGCCGTAGTTGGAGATA  | ACAGCTTCAGCACTGACACG  | GGGTGCCGTAGTTGGAGATA |
| <i>REL</i>      | ACAAATGTGAAGGGCGATCA  | CCGTCTCTGCAGTCTTTTCC  | GGAGCACAGCACAGACAACA  | CCGTCTCTGCAGTCTTTTCC |
| <i>RGS16</i>    | CACGCTTTCCTGAAGACAGA  | GACCTCTTTAGGGGCCTCAC  | CACGCTTTCCTGAAGACAGA  | GACCTCTTTAGGGGCCTCAC |
| <i>RORA</i>     | CACCAGCATCAGGCTTCTTT  | GGTCTGCCACGTTATCTGCT  | CACCAGCATCAGGCTTCTTT  | GGTCTGCCACGTTATCTGCT |
| <i>RUNX1</i>    | CCCTAGGGGATGTTCCAGAT  | TGAAGCTTTTCCCTCTTCCA  | CCCTAGGGGATGTTCCAGAT  | TGAAGCTTTTCCCTCTTCCA |
| <i>RUNX2</i>    | CGGAATGCCTCTGCTGTTAT  | TGGGGAGGATTTGTGAAGAC  | CGGAATGCCTCTGCTGTTAT  | TGGGGAGGATTTGTGAAGAC |
| <i>SRP14</i>    | TATGACGGTCGAACCAAACC  | GCTGCTGCTTTGGTCTTCTT  | TACTGTGGAGGGCTTTGAGC  | GCTGCTGCTTTGGTCTTCTT |
| <i>STAT3</i>    | GCTTTTGTGACGCGATGGAGT | GCTGCAACTCCTCCAGTTTC  | GCTTTTGTGACGCGATGGAGT | GCTGCAACTCCTCCAGTTTC |
| <i>TBX21</i>    | CCGTGACTGCCTACCAGAAT  | ATCTCCCCCAAGGAATTGAC  | CCGTGACTGCCTACCAGAAT  | ATCTCCCCCAAGGAATTGAC |
| <i>TGFB1</i>    | TACCTGAACCCGTGTTGCT   | CACAACTCCGGTGACATCAAA | TACCTGAACCCGTGTTGCTT  | CAACTCCGGTGACATCAAAA |
| <i>TGFBR2</i>   | TCCACCTGTGACAACCAGAA  | GGAGAAGCAGCATCTTCCAG  | ATGAGCAACTGCAGCATCAC  | GGAGAAGCAGCATCTTCCAG |
| <i>TMEM2</i>    | TTGCCAGATCAAAATCCTC   | TCCCCAAATACAAGCAGTCC  | TCTCAGGAATTGGGATCCAG  | TCCCCAAATACAAGCAGTCC |
| <i>TNF</i>      | CCCCAGGGACCTCTCTCTAA  | TGAGGTACAGGCCCTCTGAT  | CCCAGTGACAAGCCTGTAG   | TGAGGTACAGGCCCTCTGAT |
| <i>TNFRSF18</i> | CACTGCAAACCTTGGACAGA  | CCACATGCACTGACTCCTCA  | CACTGCAAACCTTGGACAGA  | CCACATGCACTGACTCCTCA |
| <i>TNFRSF9</i>  | CACTCTGTTGCTGGTCCTCA  | CCTGGTCCTGAAAACACCTT  | CACTCTGTTGCTGGTCCTCA  | CCTGGTCCTGAAAACACCTT |
| <i>TNFSF10</i>  | GACAGACCTGCGTGCTGAT   | CAGCAGGGGCTGTTCATACT  | CCTGCAGTCTCTGTGTGG    | CAGCAGGGGCTGTTCATACT |
| <i>UBE2C</i>    | TGGCGATAAAGGGATTTCTG  | GGCGTGAGGAACTTCACTGT  | TTTCAAATGGGTAGGGACCA  | GGCGTGAGGAACTTCACTGT |

ESM Fig. 1

a. Gating on live CD3<sup>+</sup> T Lymphocytes

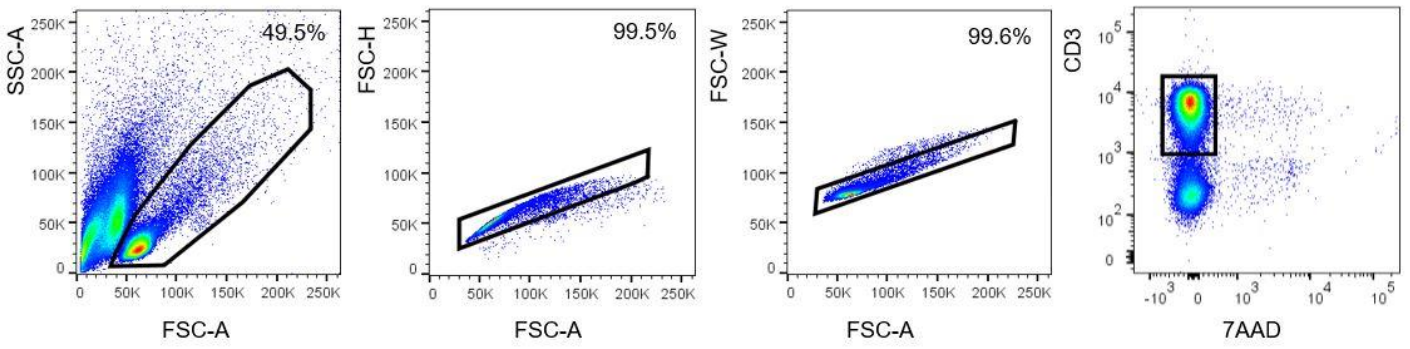

b. Sub-gating on responsive CD4<sup>+</sup> T Lymphocytes

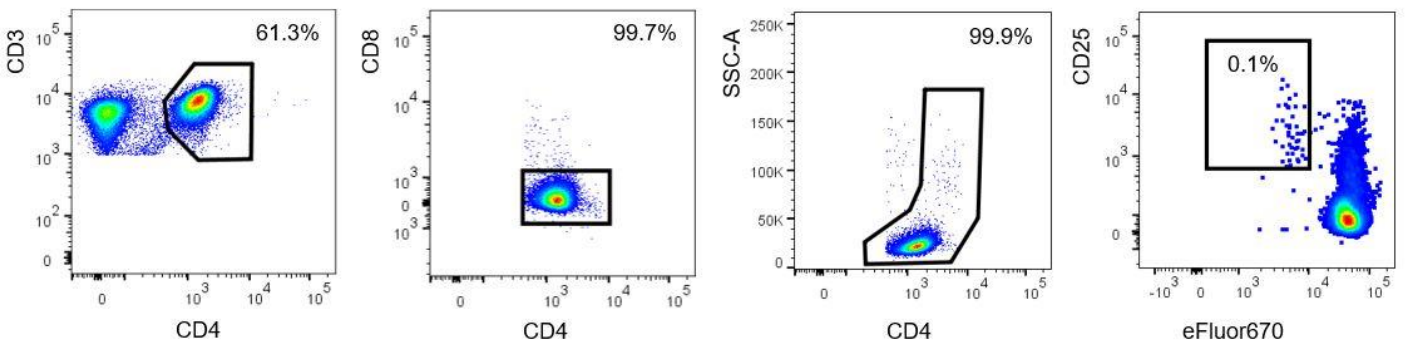

c. Sub-gating on responsive CD8<sup>+</sup> T Lymphocytes

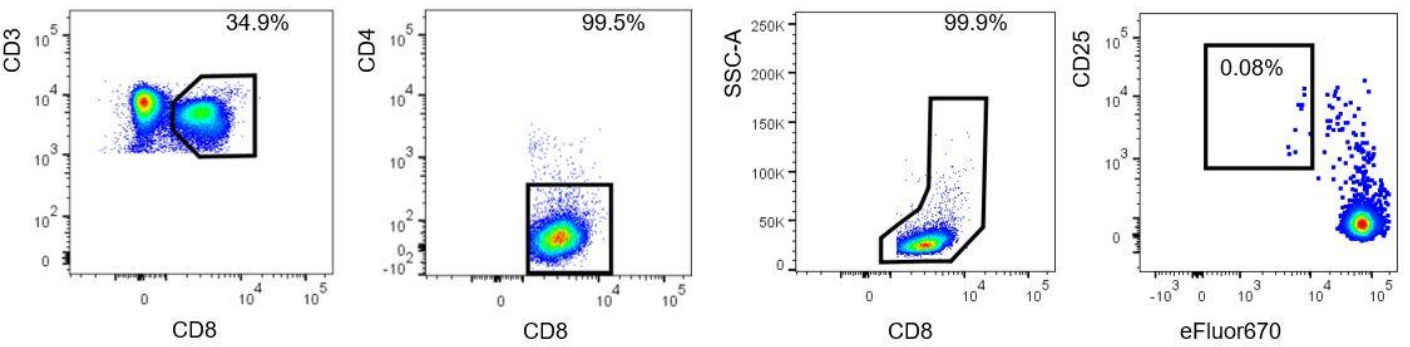

ESM Fig. 1 | Flow analysis scheme to identify insulin responsive T cells. Flow analysis was performed after 5-day culture on eFluor670 dye-labelled PBMC incubated in the presence of 50 µg/ml insulin. a, Gating strategy used to identify live single CD4<sup>+</sup> T lymphocytes. b, Sub-gating on CD4<sup>+</sup> T lymphocytes and identification of eFluor670dimCD25high responsive CD4<sup>+</sup> T cells. c, Sub-gating on CD8<sup>+</sup> T lymphocytes and identification of eFluor670dimCD25high responsive CD8<sup>+</sup> T cells.

ESM Fig. 2

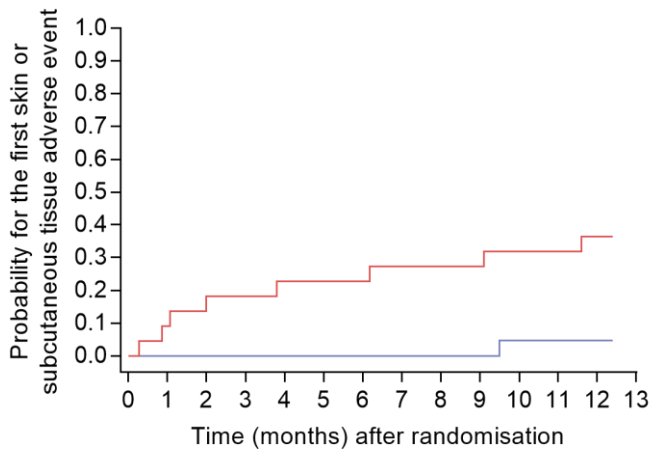

ESM Fig. 2 | Skin or subcutaneous tissue disorders. Significant difference ( $p = 0.011$ ) in the cumulative probability for the first skin or subcutaneous tissue adverse event in children treated with placebo (blue line) or oral insulin (red line).



ESM Fig. 3

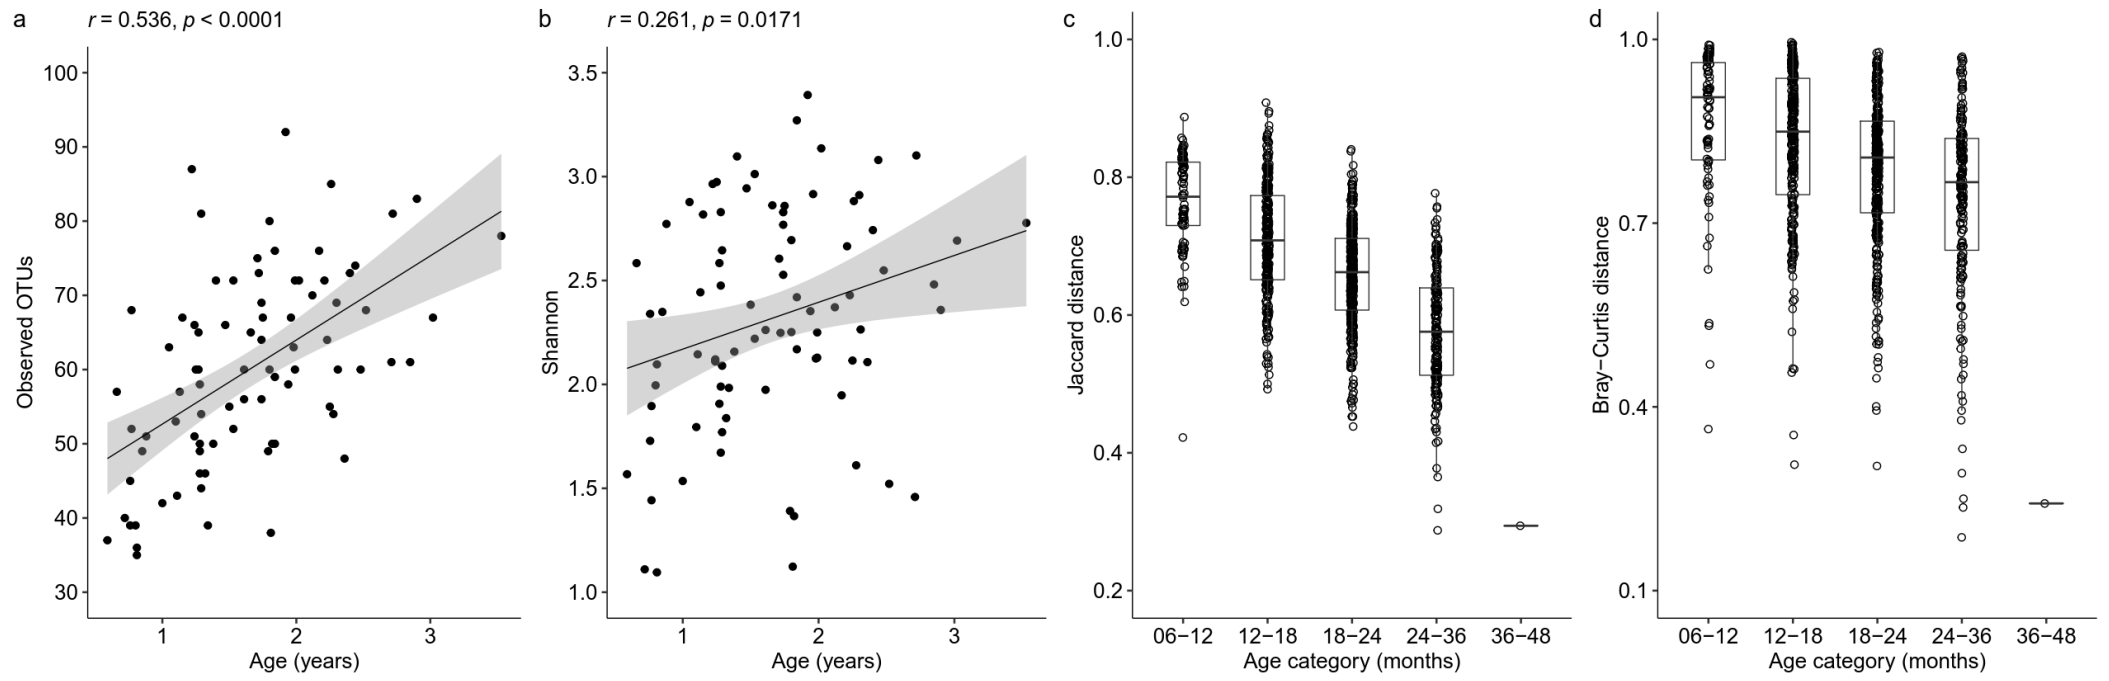

ESM Fig. 3 | Microbiome alterations in relation to age by WGS. a,b, Alpha diversity in relation to age over the time of study participation. a, Richness (Observed OTUs) and, b, evenness (Shannon). c,d, Beta diversity in relation to age over time of study participation. c, Jaccard distance, d, Bray-Curtis distance where each dot represents the distance between two samples within the age range.

ESM Fig. 4

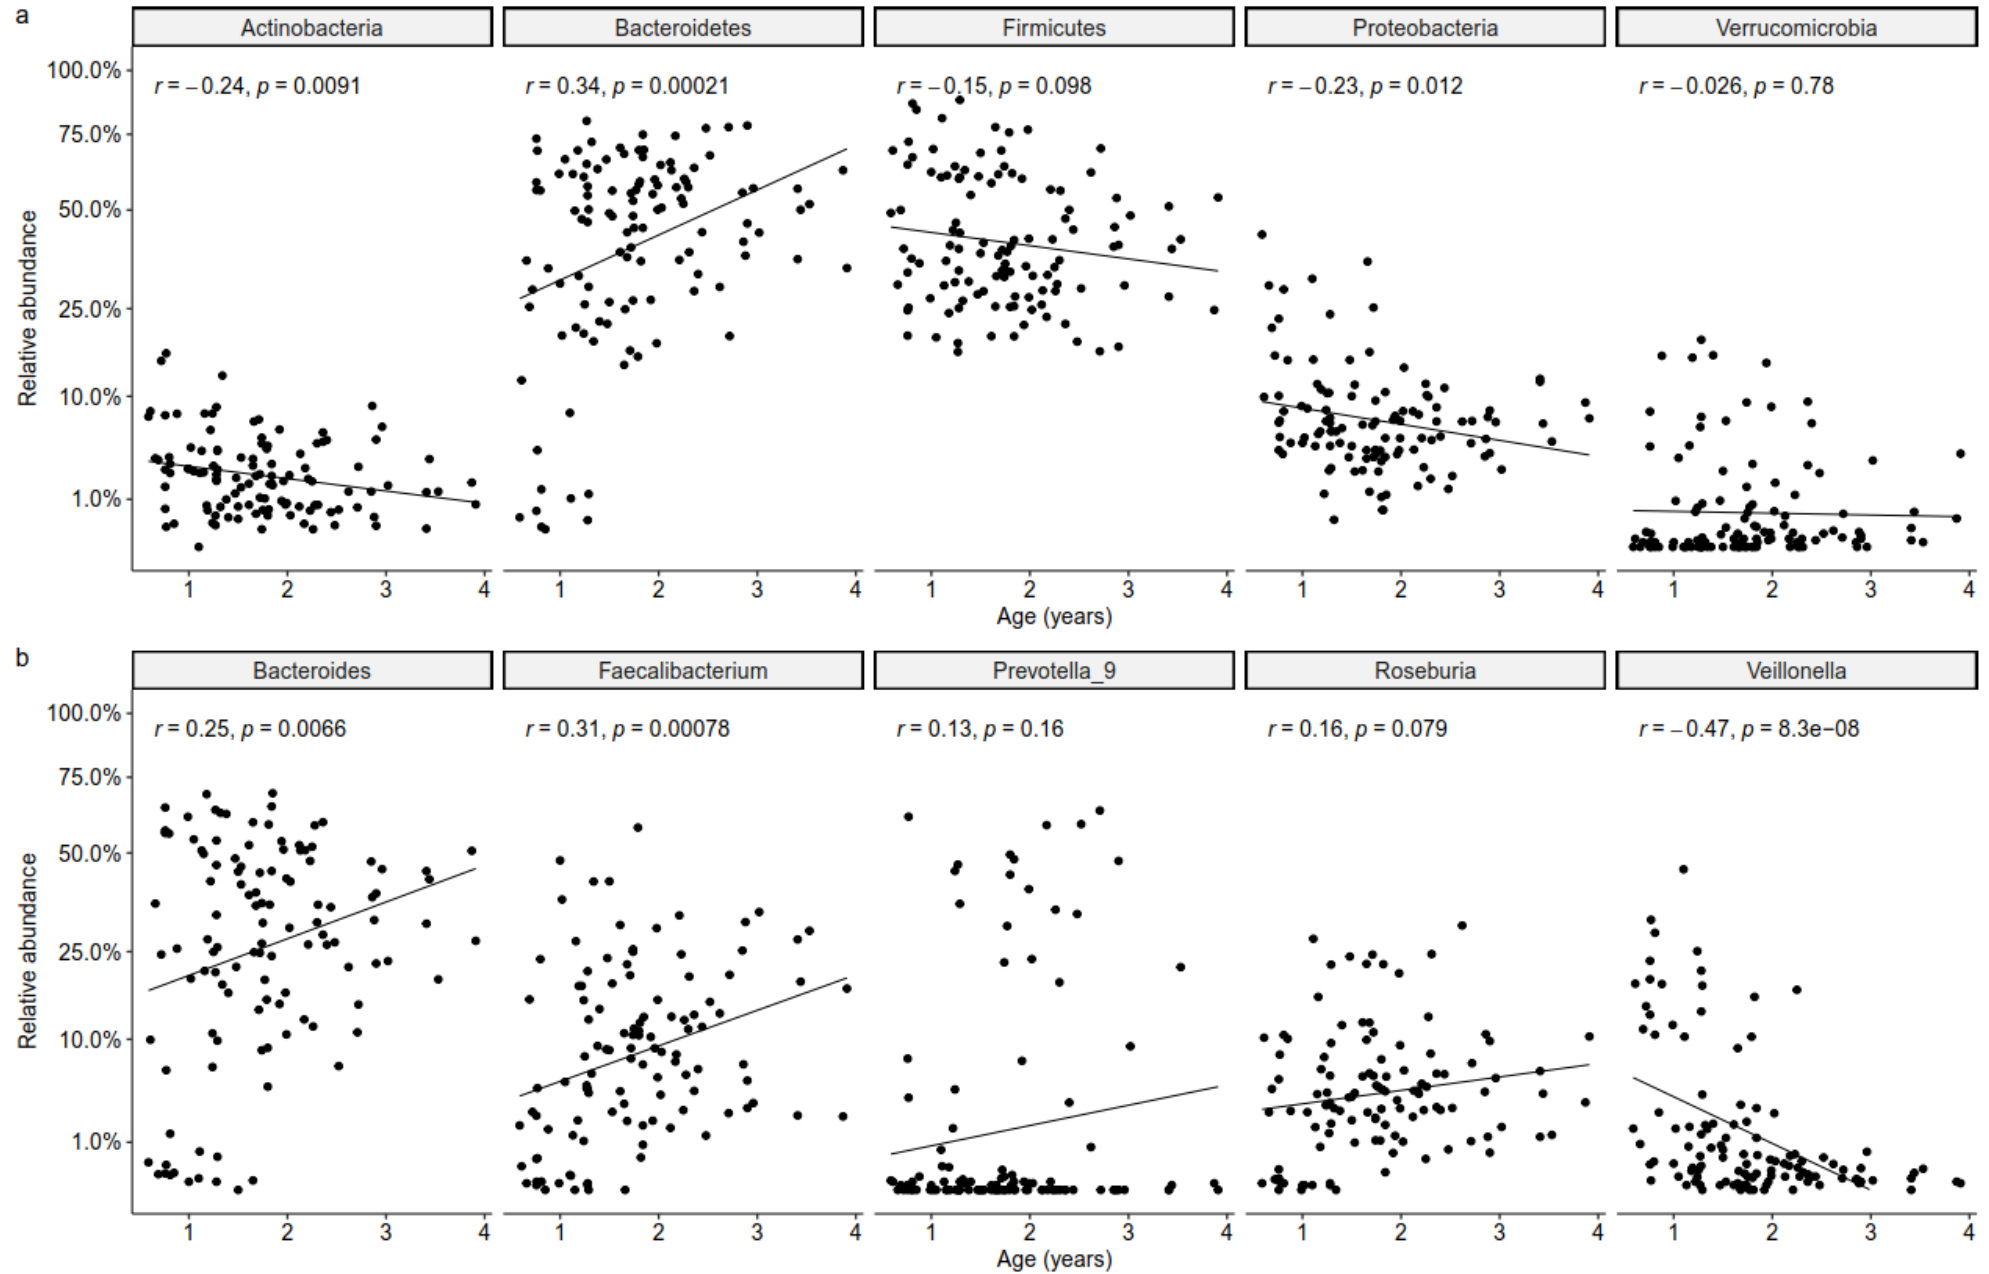

ESM Fig. 4 | Relative abundance of species level taxonomies in relation to age. a,b, the five most expressed phyla (a), and genera (b).

ESM Fig. 5

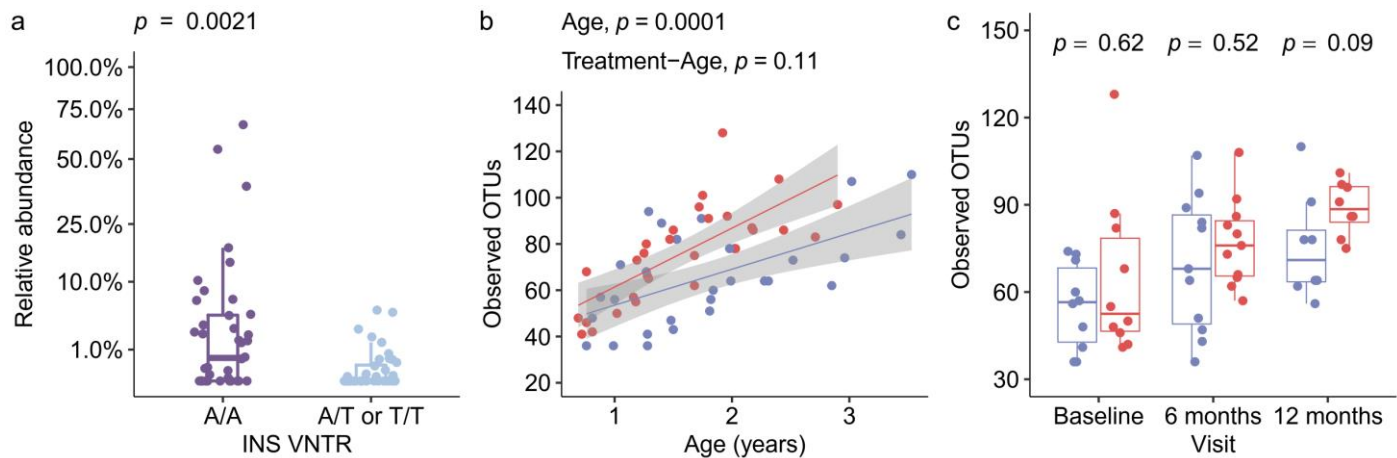

ESM Fig. 5 | Microbiome alterations in relation to age, treatment, and genotype. a, Relative abundance of *Bacteroides dorei* (baseline, 6 and 12 months) in children with the *INS* AA genotype (purple circles,  $n = 40$  samples from 16 children) or *INS* AT or TT genotypes (green circles,  $n = 40$  samples from 15 children). b, Alpha diversity by observed OTUs in relation to age over the time of study participation (baseline, 6 and 12 months) in children who received placebo (blue line and dots,  $n = 29$  samples from 11 children) or oral insulin (red line and dots,  $n = 29$  samples from 11 children). c, Alpha diversity by observed OTUs at baseline, 6 and 12 months in children who received placebo (blue dots,  $n = 10$  at baseline, 11 at 6 months, 8 at 12 months) or oral insulin (red dots,  $n = 10$  at baseline, 11 at 6 months, 8 at 12 months).

ESM Fig. 6

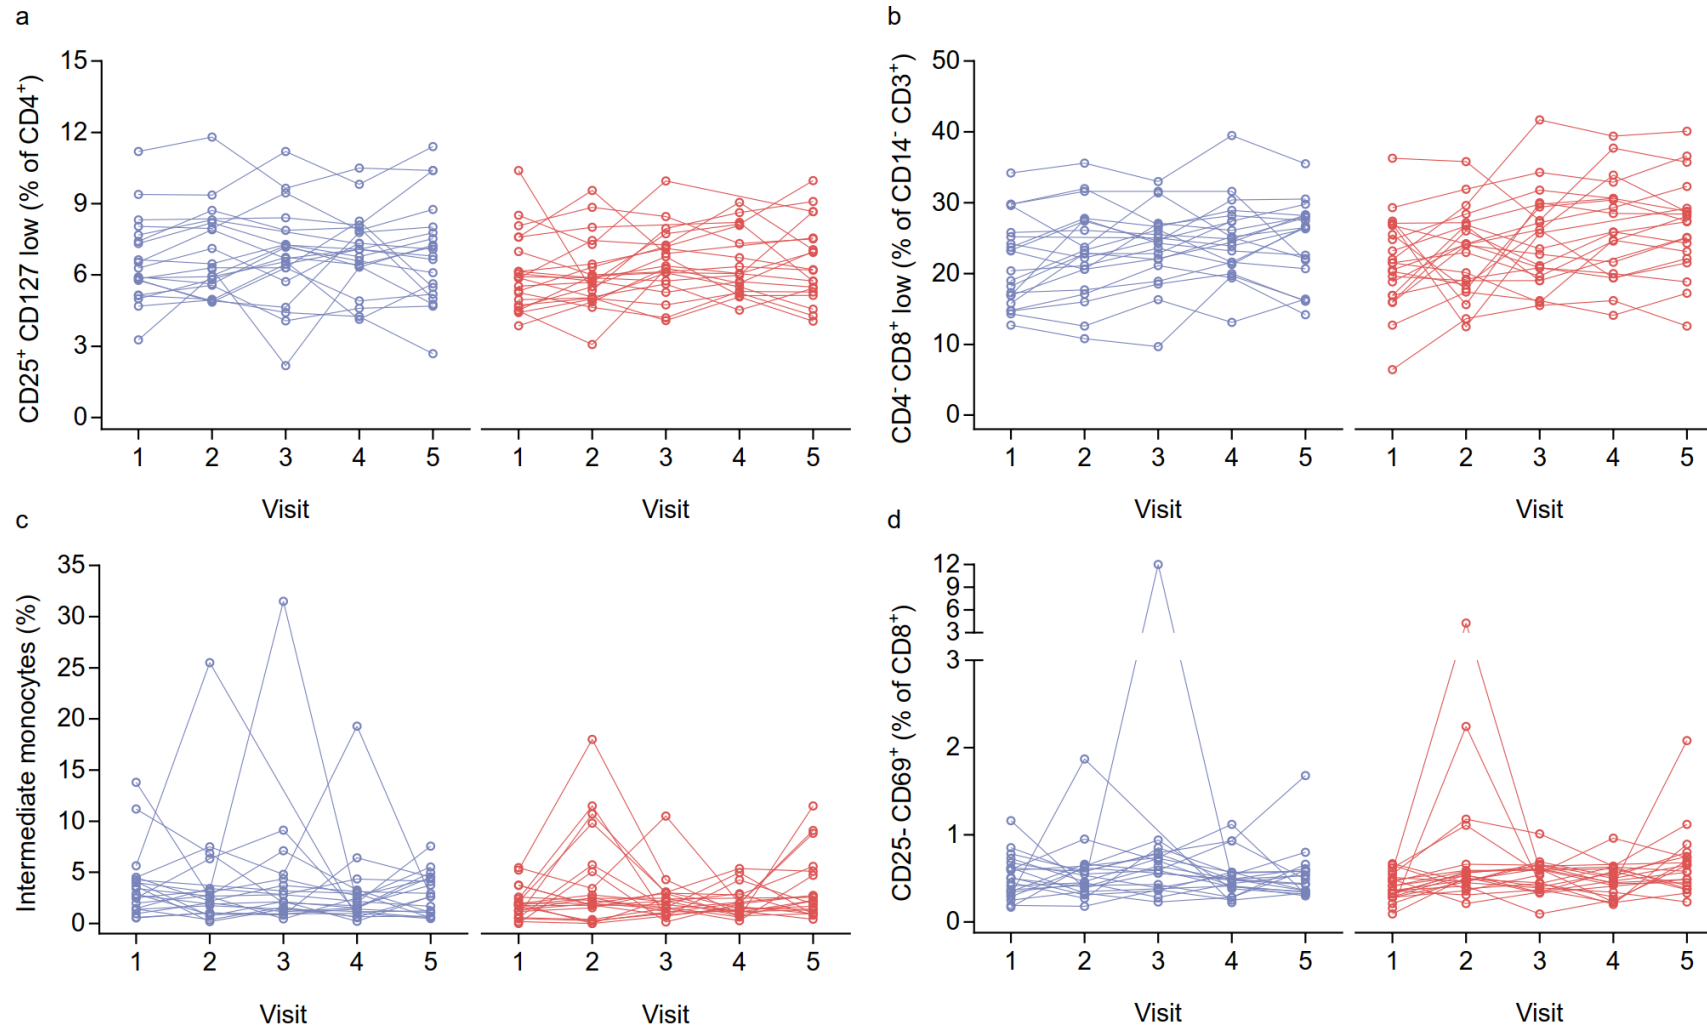

ESM Fig. 6 | Immune cell population frequencies over time of study participation in children receiving placebo (blue lines;  $N = 21$ ) or oral insulin (red lines;  $N = 22$ ).

a, CD4<sup>+</sup> regulatory T cells. b, CD8<sup>+</sup> T cells. c, intermediate monocytes (CD14<sup>++</sup>CD16<sup>+</sup> monocytes). d, CD69<sup>+</sup> activated CD8<sup>+</sup> T cells.

ESM Fig. 7

a Correlation between cell population frequencies

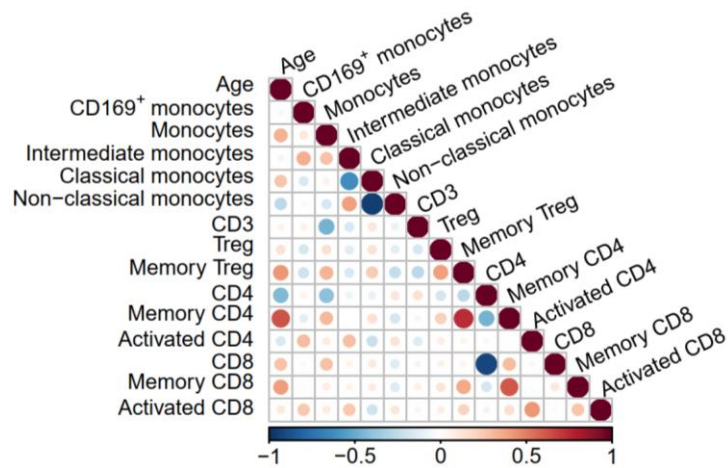

b Age prediction from cell frequencies

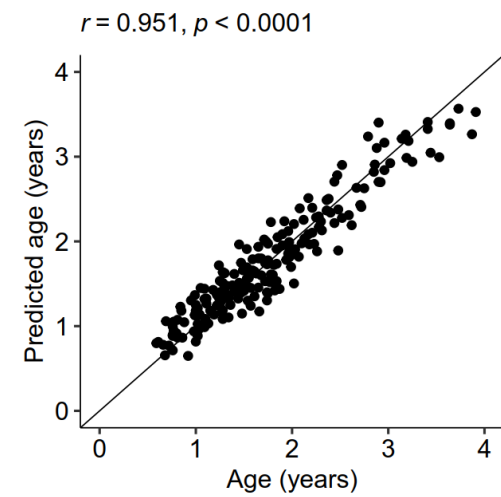

ESM Fig. 7 | Immune profiling markers in the study participants. a, Correlations between cell population frequencies and age for all study visits ( $N = 208$  samples from 43 children). b, Age predicted by a function of the cell population frequencies shown in a as compared to the actual age of children when samples were drawn.

a OTU diversity

b Shannon diversity

c Age

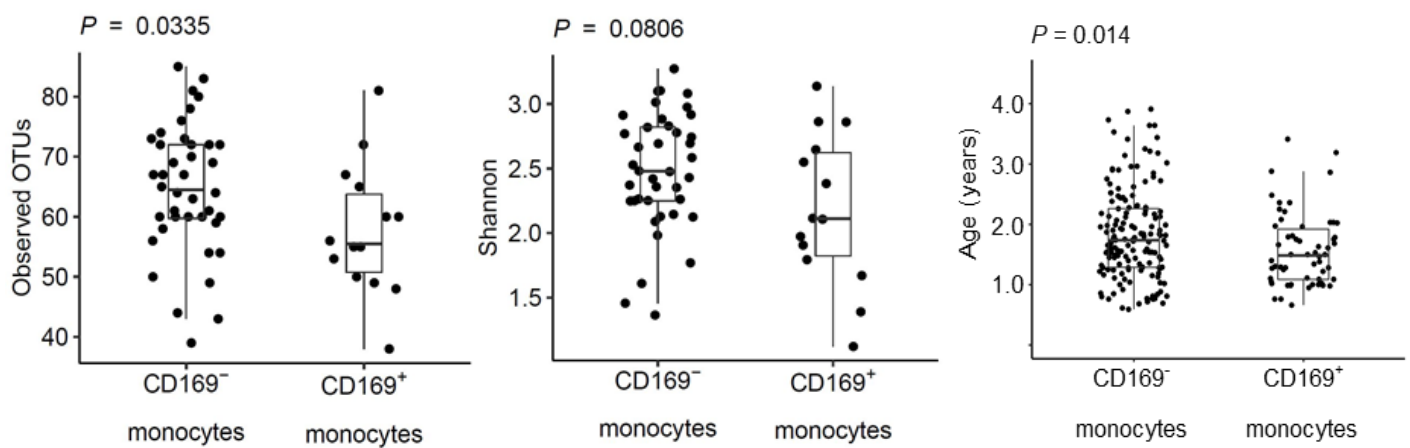

ESM Fig. 8 | Monocyte CD169 expression associations with microbiome and age. a, Alpha diversity richness in stool microbiome (OTUs) in samples at baseline, 6 and 12 months that were monocyte CD169 negative (CD169<sup>-</sup>) or positive (CD169<sup>+</sup>). b, Alpha diversity evenness in stool microbiome (Shannon index) in samples at baseline, 6 and 12 months that were monocyte CD169 negative (CD169<sup>-</sup>) or positive (CD169<sup>+</sup>). c, Age of participant at sample draw for 148 samples that were monocyte CD169 negative (CD169<sup>-</sup>) and 57 samples that were monocyte CD169 positive (CD169<sup>+</sup>).

ESM Fig. 9

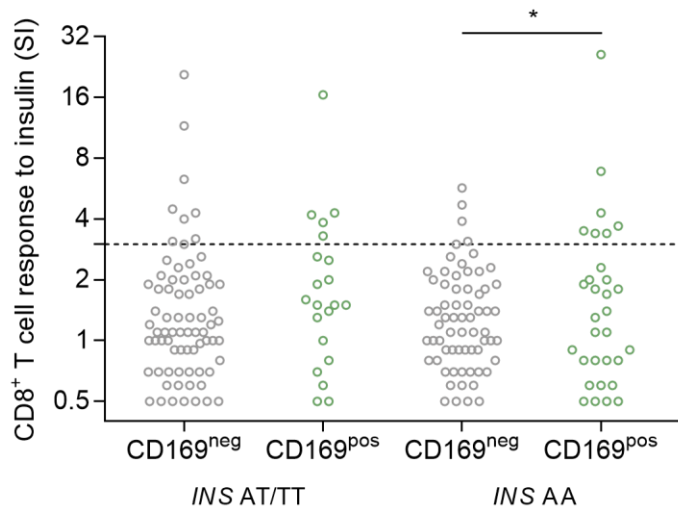

ESM Fig. 9 | CD8<sup>+</sup> T cell responses to insulin (SI) in samples from 20 children with the *INS AT* or *TT* genotype and 22 children with the *INS AA* genotype and stratified by monocyte CD169 expression as negative (CD169<sup>neg</sup>, black circles;  $n = 148$  samples) or positive (CD169<sup>pos</sup>, green circles;  $n = 58$  samples) in all study visits. \*  $p < 0.05$

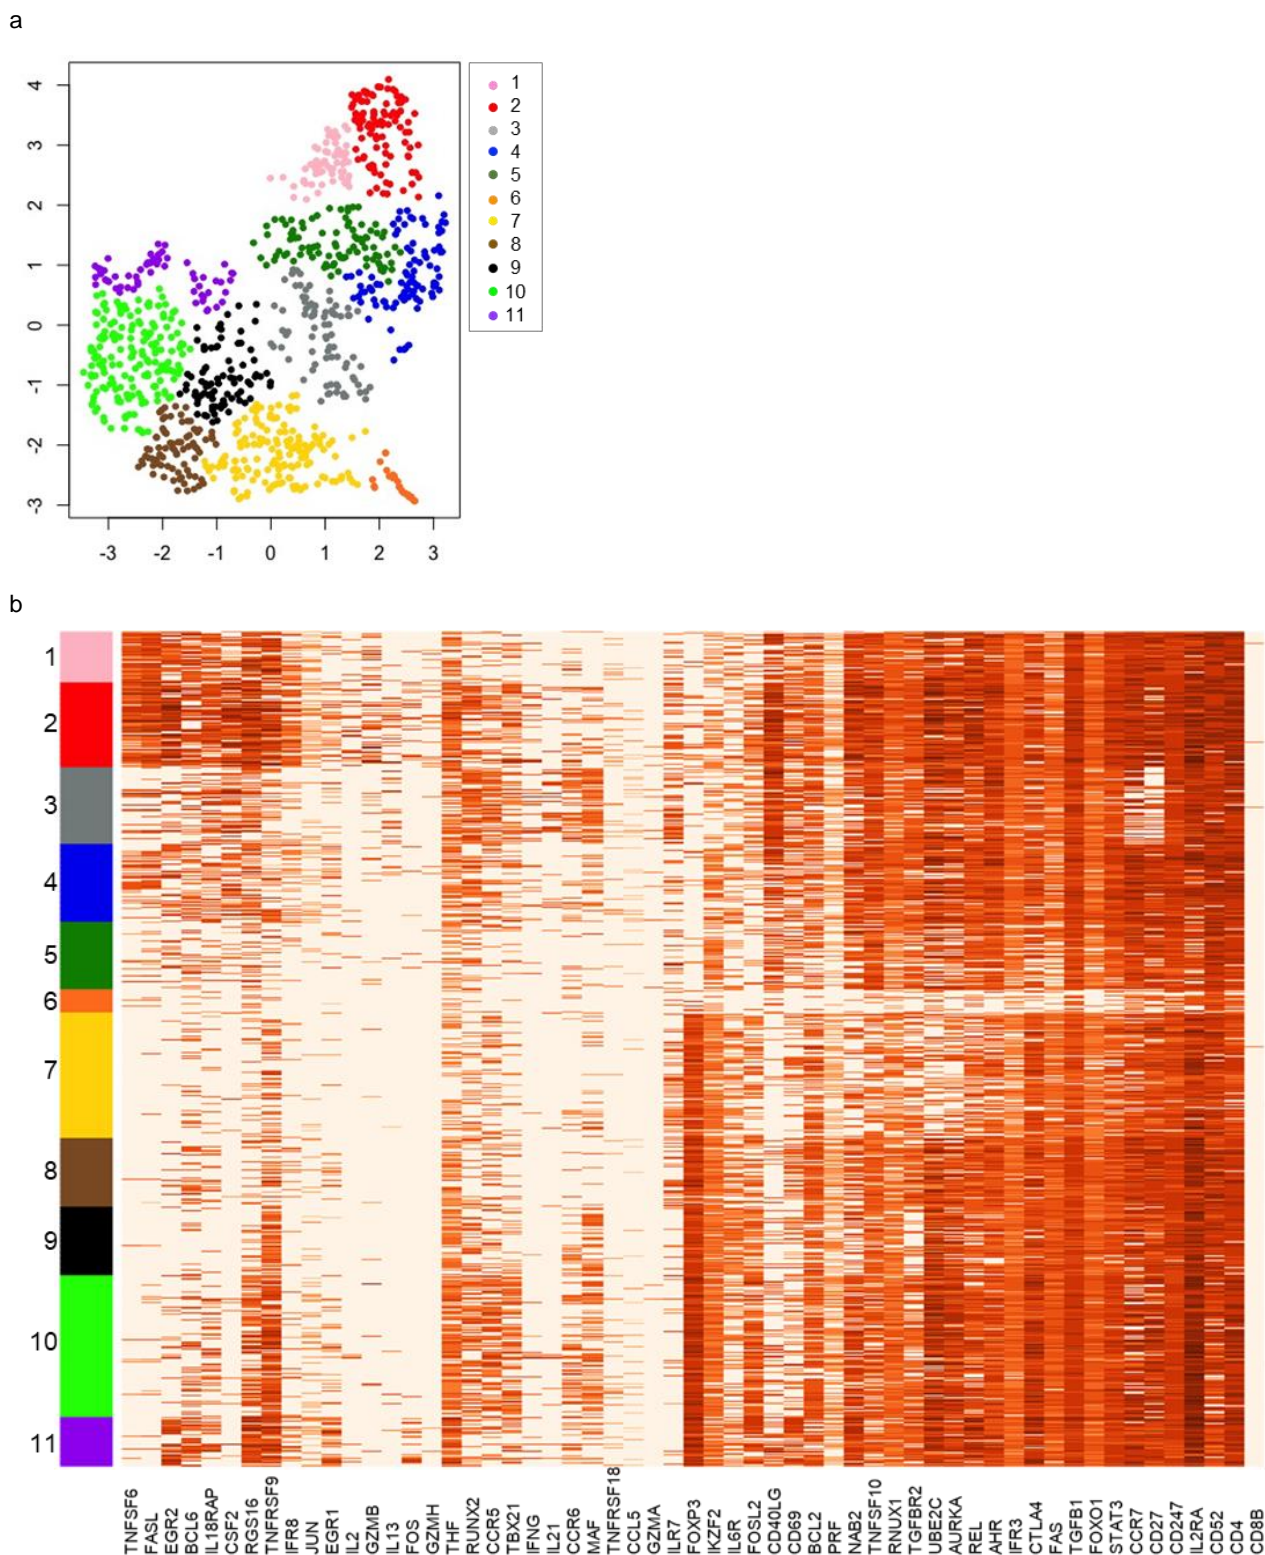

ESM Fig. 10 | Gene expression in insulin-responsive CD4<sup>+</sup> T cells. a, UMAP of expression for 76 genes in 1036 insulin-responsive CD4<sup>+</sup> T cells. Each dot represents a cell. The cells are distributed to 11 clusters containing 61 (cluster 1), 102 (cluster 2), 82 (cluster 3), 93 (cluster 4), 93 (cluster 5), 28 (cluster 6), 151 (cluster 7), 82 (cluster 8), 82 (cluster 9), 171 (cluster 10), and 60 (cluster 11) cells. b, Heatmap of gene expression for the genes that differed in their expression between the 11 clusters identified in supplementary Fig. 8a. Clusters are arranged from 1 to 11 vertically. Cluster 2 (red) and 3 (gray) were considered Th1/Th21-like. Cluster 2 cells often expressed CSF2, TNF, TBX21 and IFNG, which are characteristic of Th1 cells, and many cluster 3 cells also expressed IL21. Clusters 9 (black), 10 (light green), and 11 (purple) were considered Treg-like due to their strong FOXP3 and IKZF2 expression, and lack or sparseness of CD127 and cytokine gene expression.
